# Supplementary material
Source: HighWire-hosted journal article supplement (http://thorax.bmjjournals.com/highwire/filestream/174130/field_highwire_adjunct_files/7/JB_Supplementary_Table_4.pdf)
Supplement: JB_Supplementary_Table_4.pdf [file JB_Supplementary_Table_4.pdf]

**Supplementary Table 4.** Clover results indicate the number of chromosomes that returned transcription factor binding motifs as statistically over- or under-represented in HTE DHS overlapping promoters. Analysis was divided into three groups (all DHS, HTE-selective DHS, and ubiquitous DHS). Motifs with more than one entry in the databases were edited to include only the first occurrence of the motif.

| All DHS x 2kbUp |                         |          |          | TE-selective DHS x 2kbUp |                       |          |          | Ubiquitous DHS x 2kbUp |        |          |          |
|-----------------|-------------------------|----------|----------|--------------------------|-----------------------|----------|----------|------------------------|--------|----------|----------|
| ID              | Name                    | p < 0.01 | p > 0.99 | ID                       | Name                  | p < 0.01 | p > 0.99 | ID                     | Name   | p < 0.01 | p > 0.99 |
| MA0028.1        | ELK1                    | 23       | 0        | V\$FRA1_Q5               | FRA1                  | 16       | 0        | MA0027.1               | En1    | 23       | 0        |
| MA0039.2        | Klf4                    | 23       | 0        | V\$AP1_Q4_01             | AP-1                  | 15       | 0        | MA0028.1               | ELK1   | 23       | 0        |
| MA0060.1        | NFYA                    | 23       | 0        | V\$AP1FJ_Q2              | activator protein 1   | 10       | 0        | MA0039.2               | Klf4   | 23       | 0        |
| MA0062.2        | GABPA                   | 23       | 0        | V\$BACH1_01              | BTB and CNC homolog 1 | 9        | 0        | MA0060.1               | NFYA   | 23       | 0        |
| MA0068.1        | Pax4                    | 23       | 0        | V\$MAFB_01               | MAFB                  | 9        | 0        | MA0062.2               | GABPA  | 23       | 0        |
| MA0076.1        | ELK4                    | 23       | 0        | V\$NFE2_01               | NF-E2 p45             | 9        | 0        | MA0063.1               | Nkx2-5 | 23       | 0        |
| MA0079.2        | SP1                     | 23       | 0        | V\$CMF_02                | C-MAF                 | 8        | 0        | MA0068.1               | Pax4   | 23       | 0        |
| MA0080.2        | SPI1                    | 23       | 0        | V\$BACH2_01              | BTB and CNC homolog 2 | 7        | 0        | MA0076.1               | ELK4   | 23       | 0        |
| MA0081.1        | SPIB                    | 23       | 0        | V\$HEB_Q6                | HEB                   | 7        | 0        | MA0079.2               | SP1    | 23       | 0        |
| MA0098.1        | ETS1                    | 23       | 0        | V\$P53_05                | p53                   | 7        | 0        | MA0080.2               | SPI1   | 23       | 0        |
| MA0108.2        | TBP                     | 23       | 0        | V\$P63_01                | p63                   | 7        | 0        | MA0081.1               | SPIB   | 23       | 0        |
| MA0113.1        | NR3C1                   | 23       | 0        | V\$MAF_Q6_01             | MAF                   | 6        | 0        | MA0084.1               | SRY    | 23       | 0        |
| MA0136.1        | ELF5                    | 23       | 0        | V\$AP4_Q6                | activator protein 4   | 5        | 0        | MA0098.1               | ETS1   | 23       | 0        |
| V\$ALX3_01      | ALX-3                   | 23       | 0        | V\$ELF1_Q5               | ELF1                  | 5        | 0        | MA0108.2               | TBP    | 23       | 0        |
| V\$ALX4_02      | Alx-4                   | 23       | 0        | V\$ETS_Q4                | Ets                   | 5        | 0        | MA0113.1               | NR3C1  | 23       | 0        |
| V\$AMEF2_Q6     | myocyte enhancer factor | 23       | 0        | V\$GABPALPHA_Q4          | GABP-alpha            | 5        | 0        | MA0151.1               | ARID3A | 23       | 0        |
| V\$ARX_01       | Arx                     | 23       | 0        | V\$MYOGENIN_Q6           | myogenin              | 5        | 0        | V\$ALX3_01             | ALX-3  | 23       | 0        |
| V\$BARHL1_01    | Barhl-1                 | 23       | 0        | V\$NRF2_Q4               | heterodimer           | 5        | 0        | V\$ALX4_02             | Alx-4  | 23       | 0        |

|                |                                      |    |   |                         |                             |   |   |              |                                 |    |   |
|----------------|--------------------------------------|----|---|-------------------------|-----------------------------|---|---|--------------|---------------------------------|----|---|
|                |                                      |    |   |                         | containing Nrf2             |   |   |              |                                 |    |   |
| V\$BARHL2_01   | Barhl2                               | 23 | 0 | MA0080.2                | SPI1                        | 4 | 0 | V\$AMEF2_Q6  | myocyte enhancer factor         | 23 | 0 |
| V\$BARX1_01    | Barx1                                | 23 | 0 | MA0089.1                | NFE2L1::MafG                | 4 | 0 | V\$AP2_Q6    | activator protein 2             | 23 | 0 |
| V\$BARX2_01    | Barx-2                               | 23 | 0 | MA0106.1                | TP53                        | 4 | 0 | V\$ARX_01    | Arx                             | 23 | 0 |
| V\$BCL6_01     | BCL6                                 | 23 | 0 | V\$CACBINDINGPROTEIN_Q6 | CAC-binding protein         | 4 | 0 | V\$BARHL1_01 | Barhl-1                         | 23 | 0 |
| V\$BRN2_01     | POU factor Brn-2                     | 23 | 0 | V\$ETS1_B               | c-ETS-1 binding site        | 4 | 0 | V\$BARHL2_01 | Barhl2                          | 23 | 0 |
| V\$BRN3C_01    | Brn-3c                               | 23 | 0 | V\$ETS2_Q6              | ETS2                        | 4 | 0 | V\$BARX1_01  | Barx1                           | 23 | 0 |
| V\$BRN4_01     | Brn-4                                | 23 | 0 | V\$GR_Q6_01             | half-site matrix            | 4 | 0 | V\$BARX2_01  | Barx-2                          | 23 | 0 |
| V\$BSX_01      | Bsx                                  | 23 | 0 | V\$MATH1_Q2             | E47:MATH1                   | 4 | 0 | V\$BCL6_01   | BCL6                            | 23 | 0 |
| V\$CART1_02    | CART1                                | 23 | 0 | V\$MYOD_Q6              | myoblast determining factor | 4 | 0 | V\$BRN2_01   | POU factor Brn-2                | 23 | 0 |
| V\$CDC5_01     | cell division control protein 5      | 23 | 0 | V\$NEUROD_01            | Neuro D                     | 4 | 0 | V\$BRN3C_01  | Brn-3c                          | 23 | 0 |
| V\$CDP_03      | CDP                                  | 23 | 0 | V\$PEA3_Q6              | PEA3                        | 4 | 0 | V\$BRN4_01   | Brn-4                           | 23 | 0 |
| V\$CDX1_01     | Cdx-1                                | 23 | 0 | MA0039.2                | Klf4                        | 3 | 0 | V\$BSX_01    | Bsx                             | 23 | 0 |
| V\$CDX2_01     | Cdx-2                                | 23 | 0 | MA0081.1                | SPIB                        | 3 | 0 | V\$CART1_02  | CART1                           | 23 | 0 |
| V\$CDX_Q5      | Cdx                                  | 23 | 0 | V\$AR_Q6                | half-site matrix            | 3 | 0 | V\$CDC5_01   | cell division control protein 5 | 23 | 0 |
| V\$CEBP_01     | CCAAT/enhancer binding protein       | 23 | 0 | V\$CKROX_Q2             | CKROX                       | 3 | 0 | V\$CDP_03    | CDP                             | 23 | 0 |
| V\$CEBPA_01    | CCAAT/enhancer binding protein alpha | 23 | 0 | V\$E2A_Q2               | E2A                         | 3 | 0 | V\$CDX1_01   | Cdx-1                           | 23 | 0 |
| V\$CETS1P54_02 | c-Ets-1(p54)                         | 23 | 0 | V\$ESE1_Q3              | ESE1                        | 3 | 0 | V\$CDX2_01   | Cdx-2                           | 23 | 0 |

|              |        |    |   |                |                                                     |   |   |                  |                                         |    |   |
|--------------|--------|----|---|----------------|-----------------------------------------------------|---|---|------------------|-----------------------------------------|----|---|
| V\$CKROX_Q2  | CKROX  | 23 | 0 | V\$HMX1_01     | H6 homeobox 3                                       | 3 | 0 | V\$CDX_Q5        | Cdx                                     | 23 | 0 |
| V\$CNOT3_01  | CNOT3  | 23 | 0 | V\$NFY_C       | NF-Y binding site                                   | 3 | 0 | V\$CEBP_01       | CCAAT/enhancer binding protein          | 23 | 0 |
| V\$CPHX_01   | Cphx   | 23 | 0 | V\$PU1_Q6      | PU.1                                                | 3 | 0 | V\$CEBPA_01      | CCAAT/enhancer binding protein alpha    | 23 | 0 |
| V\$CRX_Q2    | Crx    | 23 | 0 | V\$PUR1_Q4     | PUR1                                                | 3 | 0 | V\$CEBPGAMMA_Q6  | C/EBPgamma                              | 23 | 0 |
| V\$DBX1_01   | Dbx-1  | 23 | 0 | V\$SMAD4_Q6    | SMAD4                                               | 3 | 0 | V\$CETS1P54_01   | c-Ets-1(p54)                            | 23 | 0 |
| V\$DBX2_01   | Dbx-2  | 23 | 0 | V\$STAT5A_04   | signal transducer and activator of transcription 5a | 3 | 0 | V\$CKROX_Q2      | CKROX                                   | 23 | 0 |
| V\$DLX1_01   | Dlx-1  | 23 | 0 | V\$TBX5_Q2     | TBX5                                                | 3 | 0 | V\$CNOT3_01      | CNOT3                                   | 23 | 0 |
| V\$DLX2_01   | Dlx-2  | 23 | 0 | V\$TCF11_01    | TCF11/KCRF1/Nrf1 homodimers                         | 3 | 0 | V\$CPHX_01       | Cphx                                    | 23 | 0 |
| V\$DLX3_01   | dlx3   | 23 | 0 | MA0003.1       | TFAP2A                                              | 2 | 0 | V\$CREBP1CJUN_01 | CRE-binding protein 1:c-Jun heterodimer | 23 | 0 |
| V\$DLX5_01   | dlx5   | 23 | 0 | MA0056.1       | MZF1_1-4                                            | 2 | 0 | V\$CRX_Q2        | Crx                                     | 23 | 0 |
| V\$DLX7_01   | Dlx7   | 23 | 0 | MA0136.1       | ELF5                                                | 2 | 0 | V\$DBX1_01       | Dbx-1                                   | 23 | 0 |
| V\$DOBOX4_01 | Dobox4 | 23 | 0 | MA0145.1       | Tcfcp2l1                                            | 2 | 0 | V\$DBX2_01       | Dbx-2                                   | 23 | 0 |
| V\$DOBOX5_01 | Dobox5 | 23 | 0 | MA0152.1       | NFATC2                                              | 2 | 0 | V\$DLX1_01       | Dlx-1                                   | 23 | 0 |
| V\$DUXL_01   | Duxl   | 23 | 0 | MA0156.1       | FEV                                                 | 2 | 0 | V\$DLX2_01       | Dlx-2                                   | 23 | 0 |
| V\$E2F1_01   | E2F1   | 23 | 0 | V\$AP2ALPHA_01 | AP-2alpha                                           | 2 | 0 | V\$DLX3_01       | dlx3                                    | 23 | 0 |
| V\$E2F6_01   | E2F6   | 23 | 0 | V\$AP2GAMMA_01 | AP-2gamma                                           | 2 | 0 | V\$DLX5_01       | dlx5                                    | 23 | 0 |
| V\$ELF1_Q5   | ELF1   | 23 | 0 | V\$AP2REP_01   | AP-2 repressor                                      | 2 | 0 | V\$DLX7_01       | Dlx7                                    | 23 | 0 |

|                 |                                                 |    |   |                           |                                         |   |   |               |                        |    |   |
|-----------------|-------------------------------------------------|----|---|---------------------------|-----------------------------------------|---|---|---------------|------------------------|----|---|
| V\$EMX2_01      | EMX2                                            | 23 | 0 | V\$ATF3_Q6                | activating transcription factor 3       | 2 | 0 | V\$DOBOX4_01  | Dobox4                 | 23 | 0 |
| V\$EN1_02       | En-1                                            | 23 | 0 | V\$CACCCBINDING FACTOR_Q6 | CACCC-binding factor                    | 2 | 0 | V\$DOBOX5_01  | Dobox5                 | 23 | 0 |
| V\$EN2_01       | En-2                                            | 23 | 0 | V\$CREB_Q2                | cAMP-responsive element binding protein | 2 | 0 | V\$DRI1_01    | DRI1 b.s.              | 23 | 0 |
| V\$ERG_01       | ERG                                             | 23 | 0 | V\$E12_Q6                 | E12                                     | 2 | 0 | V\$DUXL_01    | Duxl                   | 23 | 0 |
| V\$ESX1_01      | Esx1                                            | 23 | 0 | V\$EBOX_Q6_01             | Ebox                                    | 2 | 0 | V\$E2F1_01    | E2F1                   | 23 | 0 |
| V\$ETF_Q6       | ETF                                             | 23 | 0 | V\$GKLF_Q2                | GKLF (KLF4)                             | 2 | 0 | V\$E2F1DP1_01 | E2F-1:DP-1 heterodimer | 23 | 0 |
| V\$ETS2_Q6      | ETS2                                            | 23 | 0 | V\$GLI3_Q5_01             | GLI3                                    | 2 | 0 | V\$E2F6_01    | E2F6                   | 23 | 0 |
| V\$ETS_Q6       | Ets                                             | 23 | 0 | V\$IK1_Q1                 | Ikaros 1                                | 2 | 0 | V\$E2F_Q2     | E2F                    | 23 | 0 |
| V\$EVI1_04      | ectopic viral integration site 1 encoded factor | 23 | 0 | V\$LBP1_Q6                | LBP-1                                   | 2 | 0 | V\$EHF_Q1     | EHF                    | 23 | 0 |
| V\$EVX1_01      | Evx-1                                           | 23 | 0 | V\$LMAF_Q2                | LMAF                                    | 2 | 0 | V\$ELF1_Q5    | ELF1                   | 23 | 0 |
| V\$EVX2_01      | Evx2                                            | 23 | 0 | V\$MAFA_Q4_01             | MAFA                                    | 2 | 0 | V\$ELF5_01    | ELF5                   | 23 | 0 |
| V\$FLI1_Q6      | FLI1                                            | 23 | 0 | V\$MAZ_Q6                 | MAZ                                     | 2 | 0 | V\$EMX2_01    | EMX2                   | 23 | 0 |
| V\$FOXP3_01     | forkhead box P3                                 | 23 | 0 | V\$MZF1_Q5                | MZF1                                    | 2 | 0 | V\$EN2_01     | En-2                   | 23 | 0 |
| V\$FREAC7_01    | Fork head RElated ACTivator-7                   | 23 | 0 | V\$NERF_Q2                | new ets-related factor 1a               | 2 | 0 | V\$ERG_01     | ERG                    | 23 | 0 |
| V\$GABPALPHA_Q4 | GABP-alpha                                      | 23 | 0 | V\$NFAT_Q4_01             | NF-AT                                   | 2 | 0 | V\$ESX1_01    | Esx1                   | 23 | 0 |
| V\$GADP_01      | Growth-associated binding protein               | 23 | 0 | V\$SMAD3_Q6               | SMAD3                                   | 2 | 0 | V\$ETF_Q6     | ETF                    | 23 | 0 |
| V\$GBX1_01      | Gbx1                                            | 23 | 0 | V\$SP1_Q2_01              | Sp1                                     | 2 | 0 | V\$EVI1_04    | ectopic viral          | 23 | 0 |

|               |            |    |   |                    |                                                          |   |   |                     |                                              |    |   |
|---------------|------------|----|---|--------------------|----------------------------------------------------------|---|---|---------------------|----------------------------------------------|----|---|
|               |            |    |   |                    |                                                          |   |   |                     | integratio<br>n site 1<br>encoded<br>factor  |    |   |
| V\$GBX2_01    | Gbx2       | 23 | 0 | V\$SRF_Q5_01       | SRF                                                      | 2 | 0 | V\$EVX1_01          | Evx-1                                        | 23 | 0 |
| V\$GSC_01     | Gsc        | 23 | 0 | V\$STAT3_02        | signal transducer<br>and activator of<br>transcription 3 | 2 | 0 | V\$EVX2_01          | Evx2                                         | 23 | 0 |
| V\$GSH2_01    | GSH2       | 23 | 0 | V\$STAT6_02        | signal transducer<br>and activator of<br>transcription 6 | 2 | 0 | V\$FOXO3_01         | fork head<br>box 03                          | 23 | 0 |
| V\$HB24_01    | HB24       | 23 | 0 | V\$TAL1_01         | Tal-1 (Scl)                                              | 2 | 0 | V\$FOXO3A_Q1        | FOXO3A                                       | 23 | 0 |
| V\$HB9_01     | HB9        | 23 | 0 | V\$TAL1BETAITF2_01 | Tal-1beta:ITF-2<br>heterodimer                           | 2 | 0 | V\$FOXO4_01         | fork head<br>box 04                          | 23 | 0 |
| V\$HDX_01     | Hdx        | 23 | 0 | V\$TBR2_01         | TBR2                                                     | 2 | 0 | V\$FOXP3_01         | forkhead<br>box P3                           | 23 | 0 |
| V\$HMBOX1_01  | Hmbox1     | 23 | 0 | V\$TEL2_Q6         | Tel-2                                                    | 2 | 0 | V\$FREAC7_01        | Fork<br>head<br>RElated<br>ACTivator<br>-7   | 23 | 0 |
| V\$HMG1Y_01   | HMG1Y      | 23 | 0 | V\$USF_Q6          | upstream<br>stimulating factor                           | 2 | 0 | V\$GABPALPH<br>A_Q4 | GABP-<br>alpha                               | 23 | 0 |
| V\$HMX1_02    | HMX1       | 23 | 0 | V\$AP2_Q3          | AP-2                                                     | 2 | 1 | V\$GADP_01          | Growth-<br>associate<br>d binding<br>protein | 23 | 0 |
| V\$HMX3_02    | Nkx5-1     | 23 | 0 | V\$CACD_01         | CACD                                                     | 2 | 1 | V\$GBX1_01          | Gbx1                                         | 23 | 0 |
| V\$HNF1_02    | HNF-1alpha | 23 | 0 | V\$PR_Q2           | half-site matrix                                         | 2 | 1 | V\$GBX2_01          | Gbx2                                         | 23 | 0 |
| V\$HNF1B_01   | HNF-1beta  | 23 | 0 | MA0002.2           | RUNX1                                                    | 1 | 0 | V\$GKLF_02          | GKLF<br>(KLF4)                               | 23 | 0 |
| V\$HNF3_Q6_01 | HNF3       | 23 | 0 | MA0004.1           | Arnt                                                     | 1 | 0 | V\$GSC_01           | Gsc                                          | 23 | 0 |
| V\$HOMEZ_01   | Homez      | 23 | 0 | MA0031.1           | FOXD1                                                    | 1 | 0 | V\$GSH2_01          | GSH2                                         | 23 | 0 |
| V\$HOX13_02   | HOXA5      | 23 | 0 | MA0047.2           | Foxa2                                                    | 1 | 0 | V\$HB24_01          | HB24                                         | 23 | 0 |
| V\$HOXA10_01  | HOXA10     | 23 | 0 | MA0058.1           | MAX                                                      | 1 | 0 | V\$HB9_01           | HB9                                          | 23 | 0 |

|              |        |    |   |          |               |   |   |               |                                 |    |   |
|--------------|--------|----|---|----------|---------------|---|---|---------------|---------------------------------|----|---|
| V\$HOXA11_01 | HOXA11 | 23 | 0 | MA0059.1 | MYC::MAX      | 1 | 0 | V\$HBP1_Q2    | hbp1                            | 23 | 0 |
| V\$HOXA13_02 | HOXA13 | 23 | 0 | MA0060.1 | NFYA          | 1 | 0 | V\$HDX_01     | Hdx                             | 23 | 0 |
| V\$HOXA1_01  | HOXA1  | 23 | 0 | MA0061.1 | NF-kappaB     | 1 | 0 | V\$HMBOX1_01  | Hmbox1                          | 23 | 0 |
| V\$HOXA2_01  | HoxA2  | 23 | 0 | MA0067.1 | Pax2          | 1 | 0 | V\$HMG1Y_01   | HMG1Y                           | 23 | 0 |
| V\$HOXA3_02  | HOXA3  | 23 | 0 | MA0090.1 | TEAD1         | 1 | 0 | V\$HMX1_02    | HMX1                            | 23 | 0 |
| V\$HOXA4_01  | HOXA4  | 23 | 0 | MA0091.1 | TAL1::TCF3    | 1 | 0 | V\$HMX3_02    | Nkx5-1                          | 23 | 0 |
| V\$HOXA6_01  | HOXA6  | 23 | 0 | MA0092.1 | Hand1::Tcfe2a | 1 | 0 | V\$HNF1_02    | HNF-1alpha                      | 23 | 0 |
| V\$HOXA7_02  | HOXA7  | 23 | 0 | MA0093.1 | USF1          | 1 | 0 | V\$HNF1B_01   | HNF-1beta                       | 23 | 0 |
| V\$HOXA9_01  | hoxa9  | 23 | 0 | MA0100.1 | Myb           | 1 | 0 | V\$HNF3_Q6_01 | HNF3                            | 23 | 0 |
| V\$HOXB13_01 | HOXB13 | 23 | 0 | MA0104.2 | Mycn          | 1 | 0 | V\$HNF3B_01   | Hepatocyte Nuclear Factor 3beta | 23 | 0 |
| V\$HOXB3_01  | HOXB3  | 23 | 0 | MA0107.1 | RELA          | 1 | 0 | V\$HNF6_Q6    | HNF6                            | 23 | 0 |
| V\$HOXB4_01  | HOXB4  | 23 | 0 | MA0108.2 | TBP           | 1 | 0 | V\$HOMEZ_01   | Homez                           | 23 | 0 |
| V\$HOXB5_01  | HoxB5  | 23 | 0 | MA0117.1 | Mafb          | 1 | 0 | V\$HOX13_02   | HOXA5                           | 23 | 0 |
| V\$HOXB6_01  | HOXB6  | 23 | 0 | MA0130.1 | ZNF354C       | 1 | 0 | V\$HOXA10_01  | HOXA10                          | 23 | 0 |
| V\$HOXB7_01  | HOXB7  | 23 | 0 | MA0146.1 | Zfx           | 1 | 0 | V\$HOXA11_01  | HOXA11                          | 23 | 0 |
| V\$HOXB8_01  | HOXB8  | 23 | 0 | MA0147.1 | Myc           | 1 | 0 | V\$HOXA13_02  | HOXA13                          | 23 | 0 |
| V\$HOXB9_01  | HOXB9  | 23 | 0 | MA0150.1 | NFE2L2        | 1 | 0 | V\$HOXA1_01   | HOXA1                           | 23 | 0 |
| V\$HOXC10_01 | HOXC10 | 23 | 0 | MA0154.1 | EBF1          | 1 | 0 | V\$HOXA2_01   | HoxA2                           | 23 | 0 |
| V\$HOXC11_01 | HOXC11 | 23 | 0 | MA0157.1 | FOXO3         | 1 | 0 | V\$HOXA3_02   | HOXA3                           | 23 | 0 |
| V\$HOXC12_01 | HOXC12 | 23 | 0 | MA0161.1 | NFIC          | 1 | 0 | V\$HOXA4_01   | HOXA4                           | 23 | 0 |
| V\$HOXC13_01 | HOXC13 | 23 | 0 | MA0162.1 | Egr1          | 1 | 0 | V\$HOXA6_01   | HOXA6                           | 23 | 0 |
| V\$HOXC4_01  | HOXC4  | 23 | 0 | MA0164.1 | Nr2e3         | 1 | 0 | V\$HOXA7_02   | HOXA7                           | 23 | 0 |

|                     |                                     |    |   |                |                                                    |   |   |              |        |    |   |
|---------------------|-------------------------------------|----|---|----------------|----------------------------------------------------|---|---|--------------|--------|----|---|
| V\$HOXC5_01         | HOXC5                               | 23 | 0 | V\$ALX4_01     | Alx-4                                              | 1 | 0 | V\$HOXA9_01  | hoxa9  | 23 | 0 |
| V\$HOXC6_01         | HOXC6                               | 23 | 0 | V\$AREB6_01    | AREB6 (Atp1a1 regulatory element binding factor 6) | 1 | 0 | V\$HOXB13_01 | HOXB13 | 23 | 0 |
| V\$HOXC8_01         | HOXC-8                              | 23 | 0 | V\$ATF5_01     | ATF5 binding site                                  | 1 | 0 | V\$HOXB3_01  | HOXB3  | 23 | 0 |
| V\$HOXC9_01         | HOXC9                               | 23 | 0 | V\$BEN_01      | BEN                                                | 1 | 0 | V\$HOXB4_01  | HOXB4  | 23 | 0 |
| V\$HOXD10_01        | HOXD10                              | 23 | 0 | V\$CEBP_01     | CCAAT/enhancer binding protein                     | 1 | 0 | V\$HOXB5_01  | HoxB5  | 23 | 0 |
| V\$HOXD11_01        | HOXD11                              | 23 | 0 | V\$CEBPE_01    | cebpe                                              | 1 | 0 | V\$HOXB6_01  | HOXB6  | 23 | 0 |
| V\$HOXD12_01        | HOXD12                              | 23 | 0 | V\$CETS1P54_01 | c-Ets-1(p54)                                       | 1 | 0 | V\$HOXB7_01  | HOXB7  | 23 | 0 |
| V\$HOXD13_01        | HOXD13                              | 23 | 0 | V\$CHCH_01     | Churchill                                          | 1 | 0 | V\$HOXB8_01  | HOXB8  | 23 | 0 |
| V\$HOXD1_01         | HOXD1                               | 23 | 0 | V\$CP2_01      | CP2                                                | 1 | 0 | V\$HOXB9_01  | HOXB9  | 23 | 0 |
| V\$HOXD3_01         | HOXD3                               | 23 | 0 | V\$CTCF_02     | CCCTC-binding factor                               | 1 | 0 | V\$HOXC10_01 | HOXC10 | 23 | 0 |
| V\$HOXD8_01         | HOXD8                               | 23 | 0 | V\$DEC_Q1      | DEC                                                | 1 | 0 | V\$HOXC11_01 | HOXC11 | 23 | 0 |
| V\$HP1SITEFACTOR_Q6 | HP1 site factor                     | 23 | 0 | V\$DELTAEF1_01 | deltaEF1                                           | 1 | 0 | V\$HOXC12_01 | HOXC12 | 23 | 0 |
| V\$IPF1_05          | homeobox transcription factor Pdx-1 | 23 | 0 | V\$DMRT5_01    | DMRT5                                              | 1 | 0 | V\$HOXC13_01 | HOXC13 | 23 | 0 |
| V\$IRF3_Q3          | IRF3                                | 23 | 0 | V\$E47_02      | E47                                                | 1 | 0 | V\$HOXC4_01  | HOXC4  | 23 | 0 |
| V\$IRF_Q6           | IRF                                 | 23 | 0 | V\$EBF_Q6      | EBF                                                | 1 | 0 | V\$HOXC5_01  | HOXC5  | 23 | 0 |
| V\$IRX2_01          | Irx2                                | 23 | 0 | V\$ER_Q6_02    | half-site matrix, half-ERE                         | 1 | 0 | V\$HOXC6_01  | HOXC6  | 23 | 0 |
| V\$IRX3_01          | Irx-3                               | 23 | 0 | V\$FLI1_Q6     | FLI1                                               | 1 | 0 | V\$HOXC8_01  | HOXC-8 | 23 | 0 |
| V\$IRX4_01          | IRX4                                | 23 | 0 | V\$FOXO4_02    | fork head box O4                                   | 1 | 0 | V\$HOXC9_01  | HOXC9  | 23 | 0 |
| V\$IRX5_01          | Irx5                                | 23 | 0 | V\$FXR_Q2      | half-site                                          | 1 | 0 | V\$HOXD10_01 | HOXD10 | 23 | 0 |
| V\$IRXB3_01         | IRXB3                               | 23 | 0 | V\$GLI1_01     | GLI1                                               | 1 | 0 | V\$HOXD11_01 | HOXD11 | 23 | 0 |
| V\$ISL2_01          | Isl2                                | 23 | 0 | V\$GLI2_01     | GLI2                                               | 1 | 0 | V\$HOXD12_01 | HOXD12 | 23 | 0 |

|               |        |    |   |               |                                                                       |   |   |                     |                                     |    |   |
|---------------|--------|----|---|---------------|-----------------------------------------------------------------------|---|---|---------------------|-------------------------------------|----|---|
| V\$ISX_01     | isx    | 23 | 0 | V\$GZF1_01    | plays a role in renal branching morphogenesis                         | 1 | 0 | V\$HOXD13_01        | HOXD13                              | 23 | 0 |
| V\$K2B_01     | K-2b   | 23 | 0 | V\$HELIOSA_01 | Helios A                                                              | 1 | 0 | V\$HOXD1_01         | HOXD1                               | 23 | 0 |
| V\$KROX_Q6    | KROX   | 23 | 0 | V\$HEN1_01    | HEN1                                                                  | 1 | 0 | V\$HOXD3_01         | HOXD3                               | 23 | 0 |
| V\$Lbx2_01    | Lbx2   | 23 | 0 | V\$HNF8_01    | HNF-3/Fkh Homolog-8                                                   | 1 | 0 | V\$HOXD8_01         | HOXD8                               | 23 | 0 |
| V\$LH2_01     | LH-2   | 23 | 0 | V\$HNF3A_01   | FOXA1                                                                 | 1 | 0 | V\$HP1SITEFACTOR_Q6 | HP1 site factor                     | 23 | 0 |
| V\$LHX3_02    | Lhx3   | 23 | 0 | V\$HNF4_Q6_01 | HNF4                                                                  | 1 | 0 | V\$IPF1_05          | homeobox transcription factor Pdx-1 | 23 | 0 |
| V\$LHX4_01    | Lhx4   | 23 | 0 | V\$HSF1_Q6    | HSF1                                                                  | 1 | 0 | V\$IRF3_Q3          | IRF3                                | 23 | 0 |
| V\$LHX5_01    | Lhx5   | 23 | 0 | V\$HSF2_02    | Heat shock transcription factor 2                                     | 1 | 0 | V\$IRF7_01          | interferon regulatory factor 7      | 23 | 0 |
| V\$LHX61_01   | lhx6.1 | 23 | 0 | V\$IPF1_Q6    | IPF1                                                                  | 1 | 0 | V\$IRF_Q6           | IRF                                 | 23 | 0 |
| V\$LHX8_01    | Lhx8   | 23 | 0 | V\$KID3_01    | Kid3                                                                  | 1 | 0 | V\$IRX2_01          | Irx2                                | 23 | 0 |
| V\$LHX9_01    | Lhx9   | 23 | 0 | V\$LBP9_01    | LBP9 (Tcfcp211)                                                       | 1 | 0 | V\$IRX3_01          | Irx-3                               | 23 | 0 |
| V\$LIM1_01    | Lim-1  | 23 | 0 | V\$LFA1_Q6    | LF-A1                                                                 | 1 | 0 | V\$IRX4_01          | IRX4                                | 23 | 0 |
| V\$LMX1_01    | Lmx-1  | 23 | 0 | V\$LMO2COM_01 | complex of Lmo2 bound to Tal-1, E2A proteins, and GATA-1, half-site 1 | 1 | 0 | V\$IRX5_01          | Irx5                                | 23 | 0 |
| V\$LMX1B_01   | lmx1b  | 23 | 0 | V\$LRF_Q2     | LRF                                                                   | 1 | 0 | V\$IRXB3_01         | IRXB3                               | 23 | 0 |
| V\$MAZ_Q6     | MAZ    | 23 | 0 | V\$LTF_Q6     | LTF                                                                   | 1 | 0 | V\$ISL2_01          | Isl2                                | 23 | 0 |
| V\$MEF2_Q6_01 | MEF-2  | 23 | 0 | V\$MEIS1_01   | Meis-1 (myeloid ecotropic viral integration site 1)                   | 1 | 0 | V\$ISX_01           | isx                                 | 23 | 0 |
| V\$MEIS1_02   | Meis1  | 23 | 0 | V\$MEIS2_02   | MEIS2                                                                 | 1 | 0 | V\$K2B_01           | K-2b                                | 23 | 0 |
| V\$MEIS2_01   | Meis2  | 23 | 0 | V\$MTF1_01    | MTF1                                                                  | 1 | 0 | V\$KROX_Q6          | KROX                                | 23 | 0 |



|             |                                                       |    |   |                     |                       |   |   |               |                         |    |   |
|-------------|-------------------------------------------------------|----|---|---------------------|-----------------------|---|---|---------------|-------------------------|----|---|
| V\$MMEF2_Q6 | myocyte enhancer factor                               | 23 | 0 | V\$MYCMAX_03        | c-Myc:Max heterodimer | 1 | 0 | V\$LbX2_01    | Lbx2                    | 23 | 0 |
| V\$MOX1_01  | Mox1                                                  | 23 | 0 | V\$NF1_Q6           | nuclear factor 1      | 1 | 0 | V\$LH2_01     | LH-2                    | 23 | 0 |
| V\$MRG2_01  | MRG2                                                  | 23 | 0 | V\$NFAT2_Q5         | NF-AT2                | 1 | 0 | V\$LHX3_02    | Lhx3                    | 23 | 0 |
| V\$MSX1_01  | msh-like (muscle segment homeobox) homeobox protein 1 | 23 | 0 | V\$NFAT3_Q3         | NFAT3                 | 1 | 0 | V\$LHX4_01    | Lhx4                    | 23 | 0 |
| V\$MSX2_01  | Msx-2                                                 | 23 | 0 | V\$NFKAPPAB_01      | NF-kappaB             | 1 | 0 | V\$LHX5_01    | Lhx5                    | 23 | 0 |
| V\$MSX3_01  | Msx-3                                                 | 23 | 0 | V\$NFKB_Q6          | NF-kappaB             | 1 | 0 | V\$LHX61_01   | lhx6.1                  | 23 | 0 |
| V\$NCX_02   | Ncx                                                   | 23 | 0 | V\$NMYC_01          | N-Myc                 | 1 | 0 | V\$LHX8_01    | Lhx8                    | 23 | 0 |
| V\$NFAT1_Q6 | NFAT1                                                 | 23 | 0 | V\$NRSF_Q4          | NRSF                  | 1 | 0 | V\$LHX9_01    | Lhx9                    | 23 | 0 |
| V\$NFAT_Q6  | Nuclear factor of activated T-cells                   | 23 | 0 | V\$OCT1_07          | octamer factor 1      | 1 | 0 | V\$LIM1_01    | Lim-1                   | 23 | 0 |
| V\$NFY_01   | nuclear factor Y (Y-box binding factor)               | 23 | 0 | V\$P50RELAP65_Q5_01 | P50:RELA-P65          | 1 | 0 | V\$LMX1_01    | Lmx-1                   | 23 | 0 |
| V\$NKX11_01 | Nkx1-1                                                | 23 | 0 | V\$PAX_Q6           | Pax                   | 1 | 0 | V\$LMX1B_01   | lmx1b                   | 23 | 0 |
| V\$NKX12_01 | Nkx1-2                                                | 23 | 0 | V\$POU1F1_Q6        | POU1F1                | 1 | 0 | V\$MAZ_Q6     | MAZ                     | 23 | 0 |
| V\$NKX21_01 | Nkx2-1                                                | 23 | 0 | V\$PPARA_01         | PPAR:RXR heterodimers | 1 | 0 | V\$MEF2_Q6_01 | MEF-2                   | 23 | 0 |
| V\$NKX22_02 | NKX22                                                 | 23 | 0 | V\$PPARG_Q6         | half-site             | 1 | 0 | V\$MEIS1_02   | Meis1                   | 23 | 0 |
| V\$NKX23_01 | Nkx2-3                                                | 23 | 0 | V\$RBPJK_01         | RBP-Jkappa            | 1 | 0 | V\$MEIS2_01   | Meis2                   | 23 | 0 |
| V\$NKX24_01 | Nkx2-4                                                | 23 | 0 | V\$REX1_03          | REX1                  | 1 | 0 | V\$MMEF2_Q6   | myocyte enhancer factor | 23 | 0 |
| V\$NKX25_03 | NKX25                                                 | 23 | 0 | V\$SEF1_C           | SEF1 binding site     | 1 | 0 | V\$MOX1_01    | Mox1                    | 23 | 0 |
| V\$NKX26_01 | Nkx2-6                                                | 23 | 0 | V\$SIX1_01          | Six-1                 | 1 | 0 | V\$MRG2_01    | MRG2                    | 23 | 0 |
| V\$NKX29_01 | Nkx2-9                                                | 23 | 0 | V\$SIX2_01          | Six-2                 | 1 | 0 | V\$MSX1_01    | msh-like (muscle        | 23 | 0 |

|             |                                |    |   |                 |                                               |   |   |             |                                         |    |   |
|-------------|--------------------------------|----|---|-----------------|-----------------------------------------------|---|---|-------------|-----------------------------------------|----|---|
|             |                                |    |   |                 |                                               |   |   |             | segment homeobox) homeobox protein 1    |    |   |
| V\$NKX32_02 | Nkx3-2                         | 23 | 0 | V\$SMAD1_01     | SMAD1                                         | 1 | 0 | V\$MSX2_01  | Msx-2                                   | 23 | 0 |
| V\$NKX3A_02 | Nkx3A                          | 23 | 0 | V\$SMAD_Q6      | SMAD                                          | 1 | 0 | V\$MSX3_01  | Msx-3                                   | 23 | 0 |
| V\$NKX52_01 | Nkx5-2                         | 23 | 0 | V\$SOX_01       | SOX                                           | 1 | 0 | V\$NANOG_02 | Nanog                                   | 23 | 0 |
| V\$NKX61_01 | NKX6-1                         | 23 | 0 | V\$T3R_Q6       | half-site matrix                              | 1 | 0 | V\$NCX_01   | Ncx                                     | 23 | 0 |
| V\$NKX62_Q2 | NK related homeobox factor 6-2 | 23 | 0 | V\$TATA_01      | cellular and viral TATA box elements          | 1 | 0 | V\$NFAT3_Q3 | NFAT3                                   | 23 | 0 |
| V\$NKX63_01 | Nkx6-3                         | 23 | 0 | V\$TEF_01       | TEF b.s.                                      | 1 | 0 | V\$NFAT_Q6  | Nuclear factor of activated T-cells     | 23 | 0 |
| V\$NRF2_01  | nuclear respiratory factor 2   | 23 | 0 | V\$TGIF_01      | TGIF (5'TG3' interacting factor)              | 1 | 0 | V\$NFY_01   | nuclear factor Y (Y-box binding factor) | 23 | 0 |
| V\$OBOX1_01 | Obox1                          | 23 | 0 | V\$TITF1_Q3     | TTF-1, TITF1 (thyroid transcription factor 1) | 1 | 0 | V\$NKX11_01 | Nkx1-1                                  | 23 | 0 |
| V\$OBOX2_01 | Obox2                          | 23 | 0 | V\$TR4_01       | TR4                                           | 1 | 0 | V\$NKX12_01 | Nkx1-2                                  | 23 | 0 |
| V\$OBOX3_01 | Obox3                          | 23 | 0 | V\$UF1H3BETA_Q6 | UF1H3BETA                                     | 1 | 0 | V\$NKX21_01 | Nkx2-1                                  | 23 | 0 |
| V\$OBOX5_01 | Obox5                          | 23 | 0 | V\$ZBED6_01     | ZBED6                                         | 1 | 0 | V\$NKX22_02 | NKX22                                   | 23 | 0 |
| V\$OBOX6_01 | Obox6                          | 23 | 0 | V\$ZIC3_01      | zinc finger protein of the cerebellum 3       | 1 | 0 | V\$NKX23_01 | Nkx2-3                                  | 23 | 0 |
| V\$OCT1_03  | octamer factor 1               | 23 | 0 | V\$ZNF515_01    | Glis binding sites                            | 1 | 0 | V\$NKX24_01 | Nkx2-4                                  | 23 | 0 |
| V\$OCT2_01  | 2-Oct                          | 23 | 0 | MA0124.1        | NKX3-1                                        | 1 | 1 | V\$NKX25_02 | homeo domain factor Nkx-2.5/Csx,        | 23 | 0 |

|               |                      |    |   |                   |                                                                                   |   |   |             |                                |    |   |
|---------------|----------------------|----|---|-------------------|-----------------------------------------------------------------------------------|---|---|-------------|--------------------------------|----|---|
|               |                      |    |   |                   |                                                                                   |   |   |             | tinman homolog                 |    |   |
| V\$OCTAMER_01 | Octamer              | 23 | 0 | MA0138.2          | REST                                                                              | 1 | 1 | V\$NKX26_01 | Nkx2-6                         | 23 | 0 |
| V\$OG2_02     | OG-2                 | 23 | 0 | MA0153.1          | HNF1B                                                                             | 1 | 1 | V\$NKX29_01 | Nkx2-9                         | 23 | 0 |
| V\$OTP_01     | OTP                  | 23 | 0 | V\$CEBPDELTA_Q6   | C/EBPdelta                                                                        | 1 | 1 | V\$NKX32_02 | Nkx3-2                         | 23 | 0 |
| V\$OTX1_01    | Otx1                 | 23 | 0 | V\$EVI1_06        | ectopic viral integration site 1 encoded factor                                   | 1 | 1 | V\$NKX3A_02 | Nkx3A                          | 23 | 0 |
| V\$OTX2_01    | Otx2                 | 23 | 0 | V\$GCNF_01        | GCNF (germ cell nuclear factor)                                                   | 1 | 1 | V\$NKX52_01 | Nkx5-2                         | 23 | 0 |
| V\$OTX3_01    | Otx3                 | 23 | 0 | V\$HIF2A_01       | HIF-2alpha                                                                        | 1 | 1 | V\$NKX61_01 | NKX6-1                         | 23 | 0 |
| V\$P53_03     | tumor suppressor p53 | 23 | 0 | V\$IK3_01         | Ikars 3                                                                           | 1 | 1 | V\$NKX62_Q2 | NK related homeobox factor 6-2 | 23 | 0 |
| V\$PARP_Q3    | PARP                 | 23 | 0 | V\$MECP2_01       | MECP2 b.s.                                                                        | 1 | 1 | V\$NKX63_01 | Nkx6-3                         | 23 | 0 |
| V\$PAX2_01    | Pax-2                | 23 | 0 | V\$MEIS1BHOXA9_02 | Meis-1b:HOXA9 heterodimeric binding                                               | 1 | 1 | V\$NRF1_Q6  | nuclear respiratory factor 1   | 23 | 0 |
| V\$PAX6_02    | pax6                 | 23 | 0 | V\$NKX22_01       | NK2 class homeobox factor 2                                                       | 1 | 1 | V\$NRF2_01  | nuclear respiratory factor 2   | 23 | 0 |
| V\$PAX7_01    | Pax-7                | 23 | 0 | V\$RFX1_02        | X-box binding protein RFX1                                                        | 1 | 1 | V\$OBOX1_01 | Obox1                          | 23 | 0 |
| V\$PAX8_01    | Pax-8 binding sites  | 23 | 0 | V\$SIX3_01        | Six-3                                                                             | 1 | 1 | V\$OBOX2_01 | Obox2                          | 23 | 0 |
| V\$PBX1_01    | Pbx-1                | 23 | 0 | V\$VDR_Q3         | vitamin D receptor; mediates vitamin D3-signaling, often dimerizes with RXR-alpha | 1 | 1 | V\$OBOX3_01 | Obox3                          | 23 | 0 |
| V\$PEA3_Q6    | PEA3                 | 23 | 0 | V\$ZABC1_01       | ZABC1 b.s.                                                                        | 1 | 1 | V\$OBOX5_01 | Obox5                          | 23 | 0 |
| V\$PIT1_01    | Pit-1                | 23 | 0 | V\$FOXP1_01       | FOXP1                                                                             | 1 | 2 | V\$OBOX6_01 | Obox6                          | 23 | 0 |

|              |                                  |    |   |            |              |   |   |               |                      |    |   |
|--------------|----------------------------------|----|---|------------|--------------|---|---|---------------|----------------------|----|---|
| V\$PITX1_01  | Pitx1                            | 23 | 0 | V\$PARP_Q3 | PARP         | 1 | 2 | V\$OCT1_03    | octamer factor 1     | 23 | 0 |
| V\$PITX2_01  | PITX2                            | 23 | 0 | MA0019.1   | Ddit3::Cebpa | 1 | 3 | V\$OCT2_01    | 2-Oct                | 23 | 0 |
| V\$PITX3_01  | Pitx3                            | 23 | 0 | MA0006.1   | Arnt::Ahr    | 0 | 1 | V\$OCT_Q6     | Octamer              | 23 | 0 |
| V\$PKNOX2_01 | PKNOX2                           | 23 | 0 | MA0017.1   | NR2F1        | 0 | 1 | V\$OCTAMER_01 | Octamer              | 23 | 0 |
| V\$PMX2A_01  | PMX2A                            | 23 | 0 | MA0029.1   | Evi1         | 0 | 1 | V\$OG2_02     | OG-2                 | 23 | 0 |
| V\$PMX2B_01  | PMX2B                            | 23 | 0 | MA0032.1   | FOXC1        | 0 | 1 | V\$OTP_01     | OTP                  | 23 | 0 |
| V\$POU2F3_01 | POU2F3                           | 23 | 0 | MA0042.1   | FOXI1        | 0 | 1 | V\$OTX1_01    | Otx1                 | 23 | 0 |
| V\$POU6F1_02 | POU6F1                           | 23 | 0 | MA0051.1   | IRF2         | 0 | 1 | V\$OTX2_01    | Otx2                 | 23 | 0 |
| V\$PREP1_01  | PREP1                            | 23 | 0 | MA0062.2   | GABPA        | 0 | 1 | V\$OTX3_01    | Otx3                 | 23 | 0 |
| V\$PROP1_02  | Prop-1                           | 23 | 0 | MA0063.1   | Nkx2-5       | 0 | 1 | V\$OTX_Q1     | OTX                  | 23 | 0 |
| V\$PSX1_01   | PSX1                             | 23 | 0 | MA0074.1   | RXRA::VDR    | 0 | 1 | V\$P53_03     | tumor suppressor p53 | 23 | 0 |
| V\$PU1_Q4    | PU.1                             | 23 | 0 | MA0076.1   | ELK4         | 0 | 1 | V\$PARP_Q3    | PARP                 | 23 | 0 |
| V\$RAX_01    | rax                              | 23 | 0 | MA0077.1   | SOX9         | 0 | 1 | V\$PAX2_01    | Pax-2                | 23 | 0 |
| V\$RHGX11_01 | Rhox11                           | 23 | 0 | MA0084.1   | SRY          | 0 | 1 | V\$PAX6_02    | pax6                 | 23 | 0 |
| V\$S8_02     | S8                               | 23 | 0 | MA0087.1   | Sox5         | 0 | 1 | V\$PAX7_01    | Pax-7                | 23 | 0 |
| V\$SATB1_01  | Consensus SATB1 Binding Sequence | 23 | 0 | MA0101.1   | REL          | 0 | 1 | V\$PAX8_01    | Pax-8 binding sites  | 23 | 0 |
| V\$SHOX2_01  | Shox2                            | 23 | 0 | MA0115.1   | NR1H2::RXRA  | 0 | 1 | V\$PBX1_01    | Pbx-1                | 23 | 0 |
| V\$SIX1_01   | Six-1                            | 23 | 0 | MA0131.1   | MIZF         | 0 | 1 | V\$PEA3_Q6    | PEA3                 | 23 | 0 |
| V\$SIX2_01   | Six-2                            | 23 | 0 | MA0132.1   | Pdx1         | 0 | 1 | V\$PIT1_01    | Pit-1                | 23 | 0 |
| V\$SIX3_01   | Six-3                            | 23 | 0 | MA0158.1   | HOXA5        | 0 | 1 | V\$PITX1_01   | Pitx1                | 23 | 0 |
| V\$SIX4_01   | six4                             | 23 | 0 | MA0160.1   | NR4A2        | 0 | 1 | V\$PITX2_01   | PITX2                | 23 | 0 |
| V\$SIX6_01   | Six-6                            | 23 | 0 | MA0163.1   | PLAG1        | 0 | 1 | V\$PITX3_01   | Pitx3                | 23 | 0 |

|                  |                                                                 |    |   |               |                                                                  |   |   |              |                   |    |   |
|------------------|-----------------------------------------------------------------|----|---|---------------|------------------------------------------------------------------|---|---|--------------|-------------------|----|---|
| V\$SOX2_Q6       | SOX2                                                            | 23 | 0 | MA0258.1      | ESR2                                                             | 0 | 1 | V\$PKNOX2_01 | PKNOX2            | 23 | 0 |
| V\$SOX4_01       | SOX4                                                            | 23 | 0 | MA0259.1      | HIF1A::ARNT                                                      | 0 | 1 | V\$PMX2A_01  | PMX2A             | 23 | 0 |
| V\$SP1SP3_Q4     | SP1:SP3                                                         | 23 | 0 | V\$AHR_Q5     | aryl hydrocarbon /<br>dioxin receptor                            | 0 | 1 | V\$PMX2B_01  | PMX2B             | 23 | 0 |
| V\$SP2_01        | SP2                                                             | 23 | 0 | V\$AHRARNT_02 | aryl hydrocarbon<br>receptor:Arnt<br>heterodimers, fixed<br>core | 0 | 1 | V\$POU1F1_Q6 | POU1F1            | 23 | 0 |
| V\$SP4_Q5        | SP4                                                             | 23 | 0 | V\$ARX_01     | Arx                                                              | 0 | 1 | V\$POU2F3_01 | POU2F3            | 23 | 0 |
| V\$SR_Y01        | sex-<br>determining<br>region Y gene<br>product                 | 23 | 0 | V\$ATF4_Q2    | activating<br>transcription factor<br>4                          | 0 | 1 | V\$POU6F1_02 | POU6F1            | 23 | 0 |
| V\$STAT1_02      | signal<br>transducer and<br>activator of<br>transcription 1     | 23 | 0 | V\$BCL6_01    | BCL6                                                             | 0 | 1 | V\$PREP1_01  | PREP1             | 23 | 0 |
| V\$STAT1STAT1_Q3 | STAT1:STAT1                                                     | 23 | 0 | V\$BRACH_01   | Brachyury                                                        | 0 | 1 | V\$PROP1_02  | Prop-1            | 23 | 0 |
| V\$STAT3_02      | signal<br>transducer and<br>activator of<br>transcription 3     | 23 | 0 | V\$BRF1_01    | BRF-1                                                            | 0 | 1 | V\$PSX1_01   | PSX1              | 23 | 0 |
| V\$STAT4_01      | signal<br>transducer and<br>activator of<br>transcription 4     | 23 | 0 | V\$BSX_01     | Bsx                                                              | 0 | 1 | V\$PU1_Q4    | PU.1              | 23 | 0 |
| V\$STAT5A_03     | signal<br>transducer and<br>activator of<br>transcription<br>5a | 23 | 0 | V\$CART1_01   | Cart-1 (cartilage<br>homeoprotein 1)                             | 0 | 1 | V\$PXRRXR_01 | RXR half-<br>site | 23 | 0 |
| V\$STAT6_01      | signal<br>transducer and<br>activator of<br>transcription 6     | 23 | 0 | V\$CDP_02     | transcriptional<br>repressor CDP                                 | 0 | 1 | V\$RAX_01    | rax               | 23 | 0 |
| V\$TATA_01       | cellular and<br>viral TATA box<br>elements                      | 23 | 0 | V\$CEBPB_01   | CCAAT/enhancer<br>binding protein beta                           | 0 | 1 | V\$RHOX11_01 | Rhox11            | 23 | 0 |

|                 |                                     |    |   |               |                                           |   |   |                    |                                                    |    |   |
|-----------------|-------------------------------------|----|---|---------------|-------------------------------------------|---|---|--------------------|----------------------------------------------------|----|---|
| V\$TCF4_01      | TCF-4                               | 23 | 0 | V\$COUP_01    | COUP-TF, HNF-4                            | 0 | 1 | V\$\$S8_02         | S8                                                 | 23 | 0 |
| V\$TEF_Q6       | TEF                                 | 23 | 0 | V\$CPHX_01    | Cphx                                      | 0 | 1 | V\$\$SAP1A_01      | SAP-1a                                             | 23 | 0 |
| V\$TGIF2_01     | TGIF2                               | 23 | 0 | V\$CREBP1_01  | cAMP-responsive element binding protein 1 | 0 | 1 | V\$\$SATB1_01      | Consensus SATB1 Binding Sequence                   | 23 | 0 |
| V\$TGIF_02      | TGIF1                               | 23 | 0 | V\$CREL_01    | c-Rel                                     | 0 | 1 | V\$\$SHOX2_01      | Shox2                                              | 23 | 0 |
| V\$TST1_01      | POU-factor Tst-1/Oct-6              | 23 | 0 | V\$CRX_02     | Crx                                       | 0 | 1 | V\$\$SIX1_01       | Six-1                                              | 23 | 0 |
| V\$UNCX4.1_01   | Uncx-4.1                            | 23 | 0 | V\$DBP_Q6     | DBP                                       | 0 | 1 | V\$\$SIX2_01       | Six-2                                              | 23 | 0 |
| V\$VAX1_01      | Vax-1                               | 23 | 0 | V\$DLX2_01    | Dlx-2                                     | 0 | 1 | V\$\$SIX3_01       | Six-3                                              | 23 | 0 |
| V\$VAX2_01      | Vax-2                               | 23 | 0 | V\$DLX5_01    | dlx5                                      | 0 | 1 | V\$\$SIX4_01       | six4                                               | 23 | 0 |
| V\$VSX1_01      | Vsx1                                | 23 | 0 | V\$DOBOX4_01  | Dobox4                                    | 0 | 1 | V\$\$SIX6_01       | Six-6                                              | 23 | 0 |
| V\$ZFP206_01    | Zfp206                              | 23 | 0 | V\$DOBOX5_01  | Dobox5                                    | 0 | 1 | V\$\$SOX2_Q6       | SOX2                                               | 23 | 0 |
| MA0143.1        | Sox2                                | 22 | 0 | V\$DUXL_01    | Duxl                                      | 0 | 1 | V\$\$SOX4_01       | SOX4                                               | 23 | 0 |
| MA0151.1        | ARID3A                              | 22 | 0 | V\$E2F1_Q4_01 | E2F-1                                     | 0 | 1 | V\$\$SOX_Q6        | SOX                                                | 23 | 0 |
| V\$AP2_Q6       | activator protein 2                 | 22 | 0 | V\$E2F1DP1_01 | E2F-1:DP-1 heterodimer                    | 0 | 1 | V\$\$SP1SP3_Q4     | SP1:SP3                                            | 23 | 0 |
| V\$BEN_01       | BEN                                 | 22 | 0 | V\$E2F1DP2_01 | E2F-1:DP-2 heterodimer                    | 0 | 1 | V\$\$SP2_01        | SP2                                                | 23 | 0 |
| V\$CEBPB_01     | CCAAT/enhancer binding protein beta | 22 | 0 | V\$E2F4DP1_01 | E2F-4:DP-1 heterodimer                    | 0 | 1 | V\$\$SP4_Q5        | SP4                                                | 23 | 0 |
| V\$CEBPGAMMA_Q6 | C/EBPgamma                          | 22 | 0 | V\$E2F4DP2_01 | E2F-4:DP-2 heterodimer                    | 0 | 1 | V\$\$STAT1_02      | signal transducer and activator of transcription 1 | 23 | 0 |
| V\$CHCH_01      | Churchill                           | 22 | 0 | V\$E2F6_01    | E2F6                                      | 0 | 1 | V\$\$STAT1STAT1_Q3 | STAT1:STAT1                                        | 23 | 0 |
| V\$DRI1_01      | DRI1 b.s.                           | 22 | 0 | V\$E2F_Q4     | E2F                                       | 0 | 1 | V\$\$STAT3_02      | signal transducer and                              | 23 | 0 |

|              |                                 |    |   |             |                                      |   |   |              |                                                     |    |   |
|--------------|---------------------------------|----|---|-------------|--------------------------------------|---|---|--------------|-----------------------------------------------------|----|---|
|              |                                 |    |   |             |                                      |   |   |              | activator of transcription 3                        |    |   |
| V\$EHF_01    | EHF                             | 22 | 0 | V\$EGR3_01  | early growth response gene 3 product | 0 | 1 | V\$STAT4_01  | signal transducer and activator of transcription 4  | 23 | 0 |
| V\$FOXJ2_02  | fork head box J2                | 22 | 0 | V\$EMX2_01  | EMX2                                 | 0 | 1 | V\$STAT5A_03 | signal transducer and activator of transcription 5a | 23 | 0 |
| V\$FOXO3A_Q1 | FOXO3A                          | 22 | 0 | V\$EN1_02   | En-1                                 | 0 | 1 | V\$STAT6_01  | signal transducer and activator of transcription 6  | 23 | 0 |
| V\$FOXO4_01  | fork head box O4                | 22 | 0 | V\$EN2_01   | En-2                                 | 0 | 1 | V\$TATA_01   | cellular and viral TATA box elements                | 23 | 0 |
| V\$GABP_B    | GA binding protein              | 22 | 0 | V\$EVX1_01  | Evx-1                                | 0 | 1 | V\$TCF4_01   | TCF-4                                               | 23 | 0 |
| V\$HNF3B_01  | Hepatocyte Nuclear Factor 3beta | 22 | 0 | V\$EVX2_01  | Evx2                                 | 0 | 1 | V\$TEF_Q6    | TEF                                                 | 23 | 0 |
| V\$IRF7_01   | interferon regulatory factor 7  | 22 | 0 | V\$GATA1_01 | GATA-binding factor 1                | 0 | 1 | V\$TGIF2_01  | TGIF2                                               | 23 | 0 |
| V\$NFAT2_Q5  | NF-AT2                          | 22 | 0 | V\$GATA2_01 | GATA-binding factor 2                | 0 | 1 | V\$TGIF_02   | TGIF1                                               | 23 | 0 |
| V\$NFAT3_Q3  | NFAT3                           | 22 | 0 | V\$GATA3_02 | GATA-binding factor 3                | 0 | 1 | V\$TST1_01   | POU-factor Tst-1/Oct-6                              | 23 | 0 |

|               |                              |    |   |                 |                                  |   |   |               |                                            |    |   |
|---------------|------------------------------|----|---|-----------------|----------------------------------|---|---|---------------|--------------------------------------------|----|---|
| V\$NRF1_Q6    | nuclear respiratory factor 1 | 22 | 0 | V\$GATA4_Q3     | GATA-4                           | 0 | 1 | V\$UNCX4.1_01 | Uncx-4.1                                   | 23 | 0 |
| V\$OCT_Q6     | Octamer                      | 22 | 0 | V\$GATA_C       | GATA binding site                | 0 | 1 | V\$VAX1_01    | Vax-1                                      | 23 | 0 |
| V\$SOX_Q6     | SOX                          | 22 | 0 | V\$GBX1_01      | Gbx1                             | 0 | 1 | V\$VAX2_01    | Vax-2                                      | 23 | 0 |
| V\$TR4_01     | TR4                          | 22 | 0 | V\$GBX2_01      | Gbx2                             | 0 | 1 | V\$VSX1_01    | Vsx1                                       | 23 | 0 |
| MA0040.1      | Foxq1                        | 21 | 0 | V\$GFI1_Q6      | Gfi1                             | 0 | 1 | V\$ZFP206_01  | Zfp206                                     | 23 | 0 |
| MA0050.1      | IRF1                         | 21 | 0 | V\$GSC_01       | Gsc                              | 0 | 1 | MA0033.1      | FOXL1                                      | 22 | 0 |
| MA0063.1      | Nkx2-5                       | 21 | 0 | V\$GSH2_01      | GSH2                             | 0 | 1 | MA0040.1      | Foxq1                                      | 22 | 0 |
| MA0139.1      | CTCF                         | 21 | 0 | V\$HB9_01       | HB9                              | 0 | 1 | MA0050.1      | IRF1                                       | 22 | 0 |
| MA0152.1      | NFATC2                       | 21 | 0 | V\$HDX_01       | Hdx                              | 0 | 1 | MA0143.1      | Sox2                                       | 22 | 0 |
| MA0156.1      | FEV                          | 21 | 0 | V\$HFH4_01      | HFH4 (FOXJ1)                     | 0 | 1 | MA0158.1      | HOXA5                                      | 22 | 0 |
| V\$BLIMP1_Q6  | BLIMP1                       | 21 | 0 | V\$HMBOX1_01    | Hmbox1                           | 0 | 1 | V\$BEN_01     | BEN                                        | 22 | 0 |
| V\$COMP1_01   | COMP1                        | 21 | 0 | V\$HMEF2_Q6     | myocyte enhancer factor          | 0 | 1 | V\$BRCA_01    | BRCA1 containing protein complex with USF2 | 22 | 0 |
| V\$DMRT7_01   | DMRT7                        | 21 | 0 | V\$HMG1Y_Q6     | HMG1Y                            | 0 | 1 | V\$CEBPB_01   | CCAAT/enhancer binding protein beta        | 22 | 0 |
| V\$EGR_Q6     | Egr                          | 21 | 0 | V\$HNF1_Q6      | HNF1                             | 0 | 1 | V\$COMP1_01   | COMP1                                      | 22 | 0 |
| V\$FOXO3_01   | fork head box O3             | 21 | 0 | V\$HNF4ALPHA_Q6 | HNF4alpha                        | 0 | 1 | V\$CREB_01    | cAMP-responsive element binding protein    | 22 | 0 |
| V\$GKLF_02    | GKLF (KLF4)                  | 21 | 0 | V\$HOXA13_01    | HOXA13 binding site              | 0 | 1 | V\$CREBATF_Q6 | CREB, ATF                                  | 22 | 0 |
| V\$HELIOSA_02 | Helios A                     | 21 | 0 | V\$HOXA3_01     | HOXA3 (homeobox cluster protein) | 0 | 1 | V\$DMRT7_01   | DMRT7                                      | 22 | 0 |



|                 |                                            |    |   |                     |                                |   |   |               |                        |    |   |
|-----------------|--------------------------------------------|----|---|---------------------|--------------------------------|---|---|---------------|------------------------|----|---|
| V\$HFH1_01      | HNF-3/Fkh Homolog 1                        | 21 | 0 | V\$HOXA7_03         | HOXA7                          | 0 | 1 | V\$E2F1DP2_01 | E2F-1:DP-2 heterodimer | 22 | 0 |
| V\$HNF6_Q6      | HNF6                                       | 21 | 0 | V\$HOXB3_01         | HOXB3                          | 0 | 1 | V\$E2F4DP2_01 | E2F-4:DP-2 heterodimer | 22 | 0 |
| V\$ICSBP_Q6     | ICSBP                                      | 21 | 0 | V\$HOXB7_01         | HOXB7                          | 0 | 1 | V\$ETS_Q4     | Ets                    | 22 | 0 |
| V\$ISRE_01      | interferon-stimulated response element     | 21 | 0 | V\$HP1SITEFACTOR_Q6 | HP1 site factor                | 0 | 1 | V\$FAC1_01    | fetal Alz-50 clone 1   | 22 | 0 |
| V\$NANOG_02     | Nanog                                      | 21 | 0 | V\$IK2_01           | Ikaros 2                       | 0 | 1 | V\$FLI1_Q6    | FLI1                   | 22 | 0 |
| V\$OCT4_01      | Sox2-Oct4 joint motif, in silico predicted | 21 | 0 | V\$ING4_01          | ING4                           | 0 | 1 | V\$FOXJ2_02   | fork head box J 2      | 22 | 0 |
| V\$POU1F1_Q6    | POU1F1                                     | 21 | 0 | V\$IRF1_Q6          | IRF-1                          | 0 | 1 | V\$FOXO1_02   | fork head box O1       | 22 | 0 |
| V\$PXRXR_01     | RXR half-site                              | 21 | 0 | V\$IRF3_Q3          | IRF3                           | 0 | 1 | V\$GABP_B     | GA binding protein     | 22 | 0 |
| V\$SIRT6_01     | SIRT6                                      | 21 | 0 | V\$IRF7_01          | interferon regulatory factor 7 | 0 | 1 | V\$GATA4_Q3   | GATA-4                 | 22 | 0 |
| V\$ZFP281_01    | Zfp281                                     | 21 | 0 | V\$IRF_Q6_01        | IRF                            | 0 | 1 | V\$HELIOSA_02 | Helios A               | 22 | 0 |
| V\$ALPHACP1_01  | alpha-CP1                                  | 20 | 0 | V\$IRX2_01          | Irx2                           | 0 | 1 | V\$HFH1_01    | HNF-3/Fkh Homolog 1    | 22 | 0 |
| V\$AP1_Q6       | activator protein 1                        | 20 | 0 | V\$IRX3_02          | Irx-3                          | 0 | 1 | V\$ICSBP_Q6   | ICSBP                  | 22 | 0 |
| V\$CREB_01      | cAMP-responsive element binding protein    | 20 | 0 | V\$IRX4_01          | IRX4                           | 0 | 1 | V\$NFAT1_Q6   | NFAT1                  | 22 | 0 |
| V\$CREBP1CJUN_0 | CRE-binding protein 1:c-Jun                | 20 | 0 | V\$IRX5_01          | Irx5                           | 0 | 1 | V\$NFAT2_Q5   | NF-AT2                 | 22 | 0 |

|                 |                                                       |    |   |                  |                                     |   |   |                  |                                                    |    |   |
|-----------------|-------------------------------------------------------|----|---|------------------|-------------------------------------|---|---|------------------|----------------------------------------------------|----|---|
| 1               | heterodimer                                           |    |   |                  |                                     |   |   |                  |                                                    |    |   |
| V\$E2F1DP1_01   | E2F-1:DP-1 heterodimer                                | 20 | 0 | V\$IRXB3_01      | IRXB3                               | 0 | 1 | V\$OCT4_01       | Sox2-Oct4 joint motif, in silico predicted         | 22 | 0 |
| V\$E2F_Q2       | E2F                                                   | 20 | 0 | V\$ISL1_Q6       | ISL1                                | 0 | 1 | V\$RNF96_01      | RNF96                                              | 22 | 0 |
| V\$FAC1_01      | fetal Alz-50 clone 1                                  | 20 | 0 | V\$K2B_01        | K-2b                                | 0 | 1 | V\$STAT3STAT3_Q3 | STAT3:STAT3                                        | 22 | 0 |
| V\$FOXO1_01     | fork head box O1                                      | 20 | 0 | V\$KROX_Q6       | KROX                                | 0 | 1 | V\$YY1_01        | Yin and Yang 1                                     | 22 | 0 |
| V\$FPM315_01    | Zinc finger protein FPM315 with KRAB and SCAN domains | 20 | 0 | V\$LH2_01        | LH-2                                | 0 | 1 | MA0152.1         | NFATC2                                             | 21 | 0 |
| V\$GAF_Q6       | GAF                                                   | 20 | 0 | V\$LHX3_01       | LIM homeobox transcription factor 3 | 0 | 1 | MA0156.1         | FEV                                                | 21 | 0 |
| V\$GATA4_Q3     | GATA-4                                                | 20 | 0 | V\$LHX4_01       | Lhx4                                | 0 | 1 | I\$ANTP_Q6_01    | Antp                                               | 21 | 0 |
| V\$GFI1_01      | growth factor independence 1                          | 20 | 0 | V\$LHX61_01      | lhx6.1                              | 0 | 1 | V\$AFP1_Q6       | AFP1                                               | 21 | 0 |
| V\$HBP1_Q2      | hbp1                                                  | 20 | 0 | V\$LHX9_01       | Lhx9                                | 0 | 1 | V\$ALPHACP1_01   | alpha-CP1                                          | 21 | 0 |
| V\$HNF3ALPHA_Q6 | HNF3alpha                                             | 20 | 0 | V\$LXR_Q3        | LXR                                 | 0 | 1 | V\$AREB6_04      | AREB6 (Atp1a1 regulatory element binding factor 6) | 21 | 0 |
| V\$RNF96_01     | RNF96                                                 | 20 | 0 | V\$MEF2_01       | myogenic enhancer factor 2          | 0 | 1 | V\$CHCH_01       | Churchill                                          | 21 | 0 |
| V\$UF1H3BETA_Q6 | UF1H3BETA                                             | 20 | 0 | V\$MRF2_01       | modulator recognition factor 2      | 0 | 1 | V\$EGR_Q6        | Egr                                                | 21 | 0 |
| MA0046.1        | HNF1A                                                 | 19 | 0 | V\$NFKAPPAB50_01 | NF-kappaB (p50)                     | 0 | 1 | V\$ETS2_Q6       | ETS2                                               | 21 | 0 |

|               |                               |    |   |             |                                     |   |   |                 |                                        |    |   |
|---------------|-------------------------------|----|---|-------------|-------------------------------------|---|---|-----------------|----------------------------------------|----|---|
| MA0158.1      | HOXA5                         | 19 | 0 | V\$NKX12_01 | Nkx1-2                              | 0 | 1 | V\$FREAC2_01    | Fork head Related Activator -2         | 21 | 0 |
| I\$ANTP_Q6_01 | Antp                          | 19 | 0 | V\$NKX21_01 | Nkx2-1                              | 0 | 1 | V\$GAF_Q6       | GAF                                    | 21 | 0 |
| V\$AFP1_Q6    | AFP1                          | 19 | 0 | V\$NKX26_01 | Nkx2-6                              | 0 | 1 | V\$GATA3_03     | GATA-binding factor 3                  | 21 | 0 |
| V\$CREBATF_Q6 | CREB, ATF                     | 19 | 0 | V\$NKX32_02 | Nkx3-2                              | 0 | 1 | V\$ISRE_01      | interferon-stimulated response element | 21 | 0 |
| V\$OTX_Q1     | OTX                           | 19 | 0 | V\$NKX3A_01 | NK class homeobox factor 3A         | 0 | 1 | V\$POU3F2_02    | POU3F2                                 | 21 | 0 |
| V\$SAP1A_01   | SAP-1a                        | 19 | 0 | V\$NKX52_01 | Nkx5-2                              | 0 | 1 | V\$SIRT6_01     | SIRT6                                  | 21 | 0 |
| V\$TAL1_01    | Tal-1 (Scf)                   | 19 | 0 | V\$NRSE_B   | neural-restrictive-silencer-element | 0 | 1 | MA0018.2        | CREB1                                  | 20 | 0 |
| V\$TEL2_Q6    | Tel-2                         | 19 | 0 | V\$OBOX3_01 | Obox3                               | 0 | 1 | MA0046.1        | HNF1A                                  | 20 | 0 |
| V\$TFIIA_Q6   | TFIIA                         | 19 | 0 | V\$OBOX5_01 | Obox5                               | 0 | 1 | MA0139.1        | CTCF                                   | 20 | 0 |
| MA0038.1      | Gfi                           | 18 | 0 | V\$OBOX6_01 | Obox6                               | 0 | 1 | V\$ATF_B        | ATF binding site                       | 20 | 0 |
| MA0135.1      | Lhx3                          | 18 | 0 | V\$OCT2_01  | 2-Oct                               | 0 | 1 | V\$BLIMP1_Q6    | BLIMP1                                 | 20 | 0 |
| V\$ATF_B      | ATF binding site              | 18 | 0 | V\$OCT_Q6   | Octamer                             | 0 | 1 | V\$CREBP1_Q2    | CRE-binding protein 1                  | 20 | 0 |
| V\$FRA1_Q5    | FRA1                          | 18 | 0 | V\$OG2_02   | OG-2                                | 0 | 1 | V\$E2F1DP1RB_01 | Rb:E2F-1:DP-1 trimeric complex         | 20 | 0 |
| V\$FREAC2_01  | Fork head Related Activator-2 | 18 | 0 | V\$OTX1_01  | Otx1                                | 0 | 1 | V\$E2F4DP1_01   | E2F-4:DP-1 heterodimer                 | 20 | 0 |

|                  |                                                    |    |   |              |                                      |   |   |                 |                                                    |    |   |
|------------------|----------------------------------------------------|----|---|--------------|--------------------------------------|---|---|-----------------|----------------------------------------------------|----|---|
| V\$PTF1BETA_Q6   | PTF1-beta                                          | 18 | 0 | V\$OTX2_01   | Otx2                                 | 0 | 1 | V\$GFI1_01      | growth factor independence 1                       | 20 | 0 |
| V\$STAT3STAT3_Q3 | STAT3:STAT3                                        | 18 | 0 | V\$PAX1_B    | Pax-1 binding sites                  | 0 | 1 | V\$STAT_01      | signal transducers and activators of transcription | 20 | 0 |
| V\$STAT_01       | signal transducers and activators of transcription | 18 | 0 | V\$PAX5_02   | B-cell-specific activating protein   | 0 | 1 | V\$TFIIA_Q6     | TFIIA                                              | 20 | 0 |
| V\$YY1_01        | Yin and Yang 1                                     | 18 | 0 | V\$PBX1_01   | Pbx-1                                | 0 | 1 | V\$UF1H3BETA_Q6 | UF1H3BETA                                          | 20 | 0 |
| MA0027.1         | En1                                                | 17 | 0 | V\$PITX1_01  | Pitx1                                | 0 | 1 | V\$ZF5_01       | ZF5                                                | 20 | 0 |
| MA0030.1         | FOXF2                                              | 17 | 0 | V\$PITX3_01  | Pitx3                                | 0 | 1 | MA0030.1        | FOXF2                                              | 19 | 0 |
| MA0033.1         | FOXL1                                              | 17 | 0 | V\$PMX2A_01  | PMX2A                                | 0 | 1 | MA0038.1        | Gfi                                                | 19 | 0 |
| MA0142.1         | Pou5f1                                             | 17 | 0 | V\$PNR_01    | PNR                                  | 0 | 1 | MA0075.1        | Prrx2                                              | 19 | 0 |
| V\$E2F1DP2_01    | E2F-1:DP-2 heterodimer                             | 17 | 0 | V\$POU2F3_01 | POU2F3                               | 0 | 1 | MA0135.1        | Lhx3                                               | 19 | 0 |
| V\$E2F4DP2_01    | E2F-4:DP-2 heterodimer                             | 17 | 0 | V\$POU3F2_01 | POU3F2                               | 0 | 1 | V\$ATF1_Q6      | ATF1                                               | 19 | 0 |
| V\$ESE1_Q3       | ESE1                                               | 17 | 0 | V\$POU6F1_02 | POU6F1                               | 0 | 1 | V\$ATF3_Q6      | activating transcription factor 3                  | 19 | 0 |
| V\$GATA3_Q3      | GATA-binding factor 3                              | 17 | 0 | V\$PSX1_01   | PSX1                                 | 0 | 1 | V\$FOX_Q2       | FOX factors                                        | 19 | 0 |
| V\$SMAD1_01      | SMAD1                                              | 17 | 0 | V\$PXRXR_01  | RXR half-site                        | 0 | 1 | V\$HNF3ALPHA_Q6 | HNF3alpha                                          | 19 | 0 |
| V\$TFEB_01       | TFEB                                               | 17 | 1 | V\$RAX_01    | rax                                  | 0 | 1 | V\$IRF8_Q6      | IRF8                                               | 19 | 0 |
| MA0051.1         | IRF2                                               | 16 | 0 | V\$RSRFC4_01 | related to serum response factor, C4 | 0 | 1 | V\$POU5F1_01    | POU5F1 b.s.                                        | 19 | 0 |

|              |                                                                   |    |   |                |                                                          |   |   |                |                                                       |    |   |
|--------------|-------------------------------------------------------------------|----|---|----------------|----------------------------------------------------------|---|---|----------------|-------------------------------------------------------|----|---|
| MA0056.1     | MZF1_1-4                                                          | 16 | 0 | V\$\$S8_02     | S8                                                       | 0 | 1 | V\$\$SMAD1_01  | SMAD1                                                 | 19 | 0 |
| V\$AREB6_04  | AREB6<br>(Atp1a1<br>regulatory<br>element<br>binding factor<br>6) | 16 | 0 | V\$\$SAP1A_01  | SAP-1a                                                   | 0 | 1 | V\$TR4_01      | TR4                                                   | 19 | 0 |
| V\$ATF3_Q6   | activating<br>transcription<br>factor 3                           | 16 | 0 | V\$\$SF1_Q6    | SF1                                                      | 0 | 1 | MA0051.1       | IRF2                                                  | 18 | 0 |
| V\$BRCA_01   | BRCA1<br>containing<br>protein<br>complex with<br>USF2            | 16 | 0 | V\$\$SREBP1_01 | sterol regulatory<br>element-binding<br>protein 1        | 0 | 1 | V\$AIRE_01     | AIRE                                                  | 18 | 0 |
| V\$CIZ_01    | CIZ (Cas-<br>associated zinc<br>finger protein)                   | 16 | 0 | V\$STAT1_01    | signal transducer<br>and activator of<br>transcription 1 | 0 | 1 | V\$CIZ_01      | CIZ (Cas-<br>associated<br>zinc<br>finger<br>protein) | 18 | 0 |
| V\$FREAC3_01 | Fork head<br>Related<br>ACTivator-3                               | 16 | 0 | V\$TAXCREB_01  | Tax/CREB complex                                         | 0 | 1 | V\$FOXD3_01    | fork head<br>box D3                                   | 18 | 0 |
| V\$IRF8_Q6   | IRF8                                                              | 16 | 0 | V\$TCF3_01     | TCF-3                                                    | 0 | 1 | V\$HSF2_01     | heat<br>shock<br>factor 2                             | 18 | 0 |
| V\$NERF_Q2   | new ets-<br>related factor<br>1a                                  | 16 | 0 | V\$TCF4_01     | TCF-4                                                    | 0 | 1 | V\$PTF1BETA_06 | PTF1-<br>beta                                         | 18 | 0 |
| V\$POU3F2_02 | POU3F2                                                            | 16 | 0 | V\$TTF1_Q6     | TTF-1 (Nkx2-1)                                           | 0 | 1 | V\$SOX5_01     | Sox-5                                                 | 18 | 0 |
| MA0031.1     | FOXD1                                                             | 15 | 0 | V\$VAX1_01     | Vax-1                                                    | 0 | 1 | V\$SOX9_B1     | SOX<br>(SRY-<br>related<br>HMG<br>box)                | 18 | 0 |
| MA0144.1     | Stat3                                                             | 15 | 0 | V\$VAX2_01     | Vax-2                                                    | 0 | 1 | V\$TEL2_Q6     | Tel-2                                                 | 18 | 0 |
| V\$AIRE_01   | AIRE                                                              | 15 | 0 | V\$VDRRXR_01   | VDR:RXR                                                  | 0 | 1 | V\$TFEB_01     | TFEB                                                  | 18 | 0 |
| V\$CEBPE_01  | cebpe                                                             | 15 | 0 | V\$YY2         | YY2                                                      | 0 | 1 | V\$ZFP281_01   | Zfp281                                                | 18 | 0 |

|              |                                |    |   |              |                    |   |   |              |                                                           |    |   |
|--------------|--------------------------------|----|---|--------------|--------------------|---|---|--------------|-----------------------------------------------------------|----|---|
| V\$FOXD3_01  | fork head box D3               | 15 | 0 | V\$ZF5_B     | ZF5 binding sites  | 0 | 1 | V\$ZNF333_01 | ZNF333                                                    | 18 | 0 |
| V\$SOX9_B1   | SOX (SRY-related HMG box)      | 15 | 0 | V\$ZNF219_01 | ZNF219             | 0 | 1 | V\$FREAC3_01 | Fork head RElated ACTivator -3                            | 17 | 0 |
| V\$AR_Q6     | half-site matrix               | 14 | 0 | V\$ZNF333_01 | ZNF333             | 0 | 1 | V\$VBP_01    | PAR-type chicken vitellogenin in promoter-binding protein | 17 | 0 |
| V\$ATF1_Q6   | ATF1                           | 14 | 0 | V\$HMGA2_01  | HMGA2 binding site | 0 | 1 | MA0031.1     | FOXD1                                                     | 16 | 0 |
| V\$CREBP1_Q2 | CRE-binding protein 1          | 14 | 0 | MA0040.1     | Foxq1              | 0 | 2 | MA0125.1     | Nobox                                                     | 16 | 0 |
| V\$DMRT4_01  | DMRT4                          | 14 | 0 | MA0046.1     | HNF1A              | 0 | 2 | V\$ISL1_Q6   | ISL1                                                      | 16 | 0 |
| V\$HFH8_01   | HNF-3/Fkh Homolog-8            | 14 | 0 | MA0135.1     | Lhx3               | 0 | 2 | V\$MRF2_01   | modulator recognition factor 2                            | 16 | 0 |
| V\$HMEF2_Q6  | myocyte enhancer factor        | 14 | 0 | MA0151.1     | ARID3A             | 0 | 2 | V\$RSRFC4_Q2 | RSRFC4                                                    | 16 | 0 |
| V\$HSF_Q6    | HSF                            | 14 | 0 | V\$AIRE_02   | AIRE               | 0 | 2 | V\$STAF_01   | Se-Cys tRNA gene transcription activating factor          | 16 | 0 |
| V\$PLZF_02   | PLZF                           | 14 | 0 | V\$ALX3_01   | ALX-3              | 0 | 2 | V\$STRA13_01 | Stra13                                                    | 16 | 0 |
| V\$RSRFC4_Q2 | RSRFC4                         | 14 | 0 | V\$BARHL2_01 | Barhl2             | 0 | 2 | MA0041.1     | Foxd3                                                     | 15 | 0 |
| V\$SOX5_01   | Sox-5                          | 14 | 0 | V\$BARX2_01  | Barx-2             | 0 | 2 | V\$AR_Q2     | androgen receptor                                         | 15 | 0 |
| V\$STAF_01   | Se-Cys tRNA gene transcription | 14 | 0 | V\$BRN3C_01  | Brn-3c             | 0 | 2 | V\$CEBPE_01  | cebpe                                                     | 15 | 0 |

|                 |                                |    |   |              |                                   |   |   |                |                         |    |   |
|-----------------|--------------------------------|----|---|--------------|-----------------------------------|---|---|----------------|-------------------------|----|---|
|                 | activating factor              |    |   |              |                                   |   |   |                |                         |    |   |
| MA0018.2        | CREB1                          | 13 | 0 | V\$BRN4_01   | Brn-4                             | 0 | 2 | V\$GATA_C      | GATA binding site       | 15 | 0 |
| V\$FOX_Q2       | FOX factors                    | 13 | 0 | V\$CDX2_01   | Cdx-2                             | 0 | 2 | V\$GR_Q6       | glucocorticoid receptor | 15 | 0 |
| V\$HNF3A_01     | FOXA1                          | 13 | 0 | V\$CDX_Q5    | Cdx                               | 0 | 2 | V\$HFH8_01     | HNF-3/Fkh Homolog-8     | 15 | 0 |
| V\$IK1_01       | Ikaros 1                       | 13 | 0 | V\$DBX2_01   | Dbx-2                             | 0 | 2 | V\$HMEF2_Q6    | myocyte enhancer factor | 15 | 0 |
| V\$STRA13_01    | Stra13                         | 13 | 0 | V\$DLX1_01   | Dlx-1                             | 0 | 2 | V\$HSF1_01     | heat shock factor 1     | 15 | 0 |
| V\$WT1_Q6       | WT1                            | 13 | 0 | V\$DLX3_01   | dlx3                              | 0 | 2 | V\$HSF_Q6      | HSF                     | 15 | 0 |
| V\$AP1FJ_Q2     | activator protein 1            | 12 | 0 | V\$DLX7_01   | Dlx7                              | 0 | 2 | V\$PLZF_02     | PLZF                    | 15 | 0 |
| V\$ATF5_01      | ATF5 binding site              | 12 | 0 | V\$ESX1_01   | Esx1                              | 0 | 2 | MA0025.1       | NFIL3                   | 14 | 0 |
| V\$E2F1DP1RB_01 | Rb:E2F-1:DP-1 trimeric complex | 12 | 0 | V\$ETF_Q6    | ETF                               | 0 | 2 | MA0093.1       | USF1                    | 14 | 0 |
| V\$FOXJ3_01     | foxj3                          | 12 | 0 | V\$FAC1_01   | fetal Alz-50 clone 1              | 0 | 2 | MA0101.1       | REL                     | 14 | 0 |
| V\$GATA_C       | GATA binding site              | 12 | 0 | V\$FOXD3_01  | fork head box D3                  | 0 | 2 | MA0142.1       | Pou5f1                  | 14 | 0 |
| V\$GR_Q6        | glucocorticoid receptor        | 12 | 0 | V\$FOXO3A_Q1 | FOXO3A                            | 0 | 2 | V\$AP2GAMMA_01 | AP-2gamma               | 14 | 0 |
| V\$HSF2_01      | heat shock factor 2            | 12 | 0 | V\$GADP_01   | Growth-associated binding protein | 0 | 2 | V\$CREL_01     | c-Rel                   | 14 | 0 |
| V\$MZF1_01      | MZF1                           | 12 | 0 | V\$HMX3_02   | Nkx5-1                            | 0 | 2 | V\$DMRT4_01    | DMRT4                   | 14 | 0 |
| V\$NFKB_Q6_01   | NF-kappaB                      | 12 | 0 | V\$HNF3_Q6   | HNF3                              | 0 | 2 | V\$EFC_Q6      | RFX1 (EF-C)             | 14 | 0 |

|                |                                |    |   |              |        |   |   |              |                                                       |    |   |
|----------------|--------------------------------|----|---|--------------|--------|---|---|--------------|-------------------------------------------------------|----|---|
| V\$RFX1_02     | X-box binding protein RFX1     | 12 | 0 | V\$HNF6_Q6   | HNF6   | 0 | 2 | V\$FPM315_01 | Zinc finger protein FPM315 with KRAB and SCAN domains | 14 | 0 |
| MA0041.1       | Foxd3                          | 11 | 0 | V\$HOMEZ_01  | Homez  | 0 | 2 | MA0004.1     | Arnt                                                  | 13 | 0 |
| V\$AP2GAMMA_01 | AP-2gamma                      | 11 | 0 | V\$HOX13_02  | HOXA5  | 0 | 2 | MA0109.1     | Hltf                                                  | 13 | 0 |
| V\$E2F4DP1_01  | E2F-4:DP-1 heterodimer         | 11 | 0 | V\$HOXA11_01 | HOXA11 | 0 | 2 | V\$ESE1_Q3   | ESE1                                                  | 13 | 0 |
| V\$EFC_Q6      | RFX1 (EF-C)                    | 11 | 0 | V\$HOXA1_01  | HOXA1  | 0 | 2 | V\$RFX1_02   | X-box binding protein RFX1                            | 13 | 0 |
| V\$ISL1_Q6     | ISL1                           | 11 | 0 | V\$HOXA2_01  | HoxA2  | 0 | 2 | V\$RUSH1A_02 | RUSH-1alpha                                           | 13 | 0 |
| V\$KLF15_Q2    | KLF15                          | 11 | 0 | V\$HOXA4_01  | HOXA4  | 0 | 2 | V\$USF_01    | upstream stimulating factor                           | 13 | 0 |
| V\$LBP1_Q6     | LBP-1                          | 11 | 0 | V\$HOXA6_01  | HOXA6  | 0 | 2 | V\$TCF3_01   | TCF-3                                                 | 13 | 1 |
| V\$MRF2_01     | modulator recognition factor 2 | 11 | 0 | V\$HOXA9_01  | hoxa9  | 0 | 2 | V\$FOXJ3_01  | foxj3                                                 | 12 | 0 |
| V\$NEUROD_02   | NeuroD                         | 11 | 0 | V\$HOXB4_01  | HOXB4  | 0 | 2 | V\$HNF4_01   | hepatic nuclear factor 4                              | 12 | 0 |
| V\$NFE2_01     | NF-E2 p45                      | 11 | 0 | V\$HOXB5_01  | HoxB5  | 0 | 2 | V\$STAT5B_01 | signal transducer and activator of transcription 5b   | 12 | 0 |
| V\$TCF3_01     | TCF-3                          | 11 | 2 | V\$HOXB6_01  | HOXB6  | 0 | 2 | V\$WHN_B     | winged-helix factor nude                              | 12 | 0 |



|                  |                                                     |    |   |              |                         |   |   |                 |                         |    |   |
|------------------|-----------------------------------------------------|----|---|--------------|-------------------------|---|---|-----------------|-------------------------|----|---|
| MA0101.1         | REL                                                 | 10 | 0 | V\$HOXB9_01  | HOXB9                   | 0 | 2 | MA0003.1        | TFAP2A                  | 11 | 0 |
| V\$EAR2_Q2       | EAR2                                                | 10 | 0 | V\$HOXC10_01 | HOXC10                  | 0 | 2 | MA0087.1        | Sox5                    | 11 | 0 |
| V\$NFKAPPAB65_01 | NF-kappaB (p65)                                     | 10 | 0 | V\$HOXC11_01 | HOXC11                  | 0 | 2 | V\$AP2ALPHA_01  | AP-2alpha               | 11 | 0 |
| V\$RFX3_01       | RFX3 dimer                                          | 10 | 0 | V\$HOXC12_01 | HOXC12                  | 0 | 2 | V\$E4BP4_01     | E4BP4                   | 11 | 0 |
| V\$STAT5B_01     | signal transducer and activator of transcription 5b | 10 | 0 | V\$HOXC13_01 | HOXC13                  | 0 | 2 | V\$EAR2_Q2      | EAR2                    | 11 | 0 |
| MA0047.2         | Foxa2                                               | 9  | 0 | V\$HOXC5_01  | HOXC5                   | 0 | 2 | V\$GATA1_05     | GATA-binding factor 1   | 11 | 0 |
| MA0107.1         | RELA                                                | 9  | 0 | V\$HOXC6_01  | HOXC6                   | 0 | 2 | V\$HLF_01       | hepatic leukemia factor | 11 | 0 |
| MA0125.1         | Nobox                                               | 9  | 0 | V\$HOXC8_01  | HOXC-8                  | 0 | 2 | V\$IK1_01       | Ikaros 1                | 11 | 0 |
| V\$HNF4_01       | hepatic nuclear factor 4                            | 9  | 0 | V\$HOXC9_01  | HOXC9                   | 0 | 2 | V\$MECP2_02     | MECP2 b.s.              | 11 | 0 |
| V\$LEF1_Q2_01    | LEF1                                                | 9  | 0 | V\$HOXD12_01 | HOXD12                  | 0 | 2 | V\$RFX3_01      | RFX3 dimer              | 11 | 0 |
| V\$NF1_Q6_01     | NF-1                                                | 9  | 0 | V\$HOXD1_01  | HOXD1                   | 0 | 2 | MA0014.1        | Pax5                    | 10 | 0 |
| V\$USF_01        | upstream stimulating factor                         | 9  | 0 | V\$HOXD3_01  | HOXD3                   | 0 | 2 | MA0042.1        | FOX11                   | 10 | 0 |
| V\$ZABC1_01      | ZABC1 b.s.                                          | 9  | 0 | V\$HOXD8_01  | HOXD8                   | 0 | 2 | MA0052.1        | MEF2A                   | 10 | 0 |
| MA0003.1         | TFAP2A                                              | 8  | 0 | V\$ISL2_01   | Isl2                    | 0 | 2 | MA0058.1        | MAX                     | 10 | 0 |
| MA0042.1         | FOX11                                               | 8  | 0 | V\$MMEF2_Q6  | myocyte enhancer factor | 0 | 2 | MA0124.1        | NKX3-1                  | 10 | 0 |
| MA0052.1         | MEF2A                                               | 8  | 0 | V\$MOX1_01   | Mox1                    | 0 | 2 | V\$CEBPDELTA_Q6 | C/EBPdelta              | 10 | 0 |
| MA0087.1         | Sox5                                                | 8  | 0 | V\$MSX1_02   | Msx-1                   | 0 | 2 | V\$DMRT5_01     | DMRT5                   | 10 | 0 |
| MA0109.1         | Hltf                                                | 8  | 0 | V\$MSX3_01   | Msx-3                   | 0 | 2 | V\$FOX1M1_01    | FOX1M1                  | 10 | 0 |

|                 |                               |   |   |               |                                            |   |   |                 |                                |    |   |
|-----------------|-------------------------------|---|---|---------------|--------------------------------------------|---|---|-----------------|--------------------------------|----|---|
| MA0148.1        | FOXA1                         | 8 | 0 | V\$NCX_02     | Ncx                                        | 0 | 2 | V\$FREAC4_01    | Fork head Related Activator -4 | 10 | 0 |
| V\$AP2ALPHA_01  | AP-2alpha                     | 8 | 0 | V\$NKX24_01   | Nkx2-4                                     | 0 | 2 | V\$KLF15_Q2     | KLF15                          | 10 | 0 |
| V\$CEBPDELTA_Q6 | C/EBPdelta                    | 8 | 0 | V\$NKX25_03   | NKX25                                      | 0 | 2 | V\$NERF_Q2      | new ets-related factor 1a      | 10 | 0 |
| V\$EBF_Q6       | EBF                           | 8 | 0 | V\$NKX61_01   | NKX6-1                                     | 0 | 2 | V\$ZFX_01       | Zfx                            | 10 | 0 |
| V\$GATA1_06     | GATA-binding factor 1         | 8 | 0 | V\$NKX63_01   | Nkx6-3                                     | 0 | 2 | MA0006.1        | Arnt::Ahr                      | 9  | 0 |
| V\$HNF4ALPHA_Q6 | HNF4alpha                     | 8 | 0 | V\$OBOX1_01   | Obox1                                      | 0 | 2 | MA0107.1        | RELA                           | 9  | 0 |
| V\$HSF1_01      | heat shock factor 1           | 8 | 0 | V\$OBOX2_01   | Obox2                                      | 0 | 2 | MA0144.1        | Stat3                          | 9  | 0 |
| V\$MAZR_01      | MAZ related factor            | 8 | 0 | V\$OCT4_01    | Sox2-Oct4 joint motif, in silico predicted | 0 | 2 | MA0162.1        | Egr1                           | 9  | 0 |
| V\$RUSH1A_02    | RUSH-1alpha                   | 8 | 0 | V\$OCTAMER_01 | Octamer                                    | 0 | 2 | V\$ATF5_01      | ATF5 binding site              | 9  | 0 |
| V\$SRF_Q5_02    | SRF                           | 8 | 0 | V\$OTP_01     | OTP                                        | 0 | 2 | V\$HNF3A_01     | FOXA1                          | 9  | 0 |
| V\$ZNF333_01    | ZNF333                        | 8 | 0 | V\$PAX4_05    | Pax-4                                      | 0 | 2 | V\$HNF4ALPHA_Q6 | HNF4alpha                      | 9  | 0 |
| MA0004.1        | Arnt                          | 7 | 0 | V\$PAX6_02    | pax6                                       | 0 | 2 | V\$HTF_01       | HTF                            | 9  | 0 |
| MA0025.1        | NFIL3                         | 7 | 0 | V\$PIT1_01    | Pit-1                                      | 0 | 2 | V\$NFKB_Q6_01   | NF-kappaB                      | 9  | 0 |
| MA0055.1        | Myf                           | 7 | 0 | V\$PMX2B_01   | PMX2B                                      | 0 | 2 | V\$RBPJK_01     | RBP-Jkappa                     | 9  | 0 |
| MA0093.1        | USF1                          | 7 | 0 | V\$PROP1_02   | Prop-1                                     | 0 | 2 | V\$REX1_03      | REX1                           | 9  | 0 |
| V\$E4BP4_01     | E4BP4                         | 7 | 0 | V\$RNF96_01   | RNF96                                      | 0 | 2 | V\$WT1_Q6       | WT1                            | 9  | 0 |
| V\$HFH3_01      | HFH-3 (HNF3/fork head homolog | 7 | 0 | V\$SHOX2_01   | Shox2                                      | 0 | 2 | V\$ZABC1_01     | ZABC1 b.s.                     | 9  | 0 |

|                 |                                                        |   |   |                 |                     |   |   |                  |                                   |   |   |
|-----------------|--------------------------------------------------------|---|---|-----------------|---------------------|---|---|------------------|-----------------------------------|---|---|
|                 | 3)                                                     |   |   |                 |                     |   |   |                  |                                   |   |   |
| V\$RBPJK_Q4     | RBP-Jkappa                                             | 7 | 0 | V\$TRF1_01      | TRF1                | 0 | 2 | MA0047.2         | Foxa2                             | 8 | 0 |
| V\$REX1_03      | REX1                                                   | 7 | 0 | V\$TST1_02      | 6-Oct               | 0 | 2 | V\$CHX10_01      | CHX10                             | 8 | 0 |
| V\$TCF11_01     | TCF11/KCR-F1/Nrf1 homodimers                           | 7 | 0 | V\$UNCX4.1_01   | Uncx-4.1            | 0 | 2 | V\$DMRT3_01      | DMRT3                             | 8 | 0 |
| V\$VBP_01       | PAR-type chicken vitellogenin promoter-binding protein | 7 | 0 | V\$VSX1_01      | Vsx1                | 0 | 2 | V\$E4F1_Q6       | E4F1                              | 8 | 0 |
| MA0075.1        | Prrx2                                                  | 7 | 1 | MA0033.1        | FOXL1               | 0 | 3 | V\$LEF1_Q2_01    | LEF1                              | 8 | 0 |
| MA0014.1        | Pax5                                                   | 6 | 0 | MA0041.1        | Foxd3               | 0 | 3 | V\$TAL1_01       | Tal-1 (Scf)                       | 8 | 0 |
| V\$BACH2_01     | BTB and CNC homolog 2                                  | 6 | 0 | V\$CDX1_01      | Cdx-1               | 0 | 3 | MA0088.1         | znf143                            | 7 | 0 |
| V\$CHX10_01     | CHX10                                                  | 6 | 0 | V\$CEBPGAMMA_Q6 | C/EBPgamma          | 0 | 3 | MA0148.1         | FOXA1                             | 7 | 0 |
| V\$CREL_01      | c-Rel                                                  | 6 | 0 | V\$CNOT3_01     | CNOT3               | 0 | 3 | V\$HFH3_01       | HFH-3 (HNF3/fo rk head homolog 3) | 7 | 0 |
| V\$DMRT2_01     | DMRT2                                                  | 6 | 0 | V\$DRI1_01      | DRI1 b.s.           | 0 | 3 | V\$NFKAPPAB65_01 | NF-kappaB (p65)                   | 7 | 0 |
| V\$DMRT3_01     | DMRT3                                                  | 6 | 0 | V\$FOX_Q2       | FOX factors         | 0 | 3 | V\$NFMUE1_Q6     | NF-muE1                           | 7 | 0 |
| V\$DMRT5_01     | DMRT5                                                  | 6 | 0 | V\$HB24_01      | HB24                | 0 | 3 | V\$PAX3_B        | Pax-3 binding sites               | 7 | 0 |
| V\$MECP2_02     | MECP2 b.s.                                             | 6 | 0 | V\$HFH1_01      | HNF-3/Fkh Homolog 1 | 0 | 3 | MA0132.1         | Pdx1                              | 7 | 1 |
| V\$TCF11MAFG_01 | TCF11:MafG heterodimers                                | 6 | 0 | V\$HOXB13_01    | HOXB13              | 0 | 3 | MA0029.1         | Evi1                              | 6 | 0 |
| V\$FOXM1_01     | FOXM1                                                  | 6 | 1 | V\$HOXB8_01     | HOXB8               | 0 | 3 | V\$CLOCKBMA      | CLOCK:B                           | 6 | 0 |

|                     |                                     |   |   |              |                                |   |   | L_Q6              | MAL                                                   |   |   |
|---------------------|-------------------------------------|---|---|--------------|--------------------------------|---|---|-------------------|-------------------------------------------------------|---|---|
| MA0162.1            | Egr1                                | 5 | 0 | V\$HOXC4_01  | HOXC4                          | 0 | 3 | V\$DMRT2_01       | DMRT2                                                 | 6 | 0 |
| MA0164.1            | Nr2e3                               | 5 | 0 | V\$HOXD11_01 | HOXD11                         | 0 | 3 | V\$GATA2_02       | GATA-binding factor 2                                 | 6 | 0 |
| V\$BACH1_01         | BTB and CNC homolog 1               | 5 | 0 | V\$Lbx2_01   | Lbx2                           | 0 | 3 | V\$TCF11_01       | TCF11/KCR-F1/Nrf1 homodimers                          | 6 | 0 |
| V\$GATA2_03         | GATA-binding factor 2               | 5 | 0 | V\$LHX5_01   | Lhx5                           | 0 | 3 | MA0067.1          | Pax2                                                  | 5 | 0 |
| V\$LEF1TCF1_Q4      | LEF1, TCF1                          | 5 | 0 | V\$NKX29_01  | Nkx2-9                         | 0 | 3 | MA0140.1          | Tal1::Gata1                                           | 5 | 0 |
| V\$MAX_01           | Max                                 | 5 | 0 | V\$NKX62_Q2  | NK related homeobox factor 6-2 | 0 | 3 | V\$GATA6_01       | GATA-6                                                | 5 | 0 |
| V\$MEIS1BHOXA9_02   | Meis-1b:HOXA9 heterodimeric binding | 5 | 0 | V\$PAX7_01   | Pax-7                          | 0 | 3 | V\$MEIS1BHOXA9_02 | Meis-1b:HOXA9 heterodimeric binding                   | 5 | 0 |
| V\$MIF1_01          | MIBP-1 / RFX1 complex               | 5 | 0 | MA0052.1     | MEF2A                          | 0 | 4 | V\$MYB_Q5_01      | MYB                                                   | 5 | 0 |
| V\$P50RELAP65_Q5_01 | P50:RELA-P65                        | 5 | 0 | V\$AMEF2_Q6  | myocyte enhancer factor        | 0 | 4 | V\$NF1_Q6_01      | NF-1                                                  | 5 | 0 |
| V\$WHN_B            | winged-helix factor nude            | 5 | 0 | V\$DBX1_01   | Dbx-1                          | 0 | 4 | V\$PR_01          | high affinity binding sites for progesterone receptor | 5 | 0 |
| V\$ZF5_01           | ZF5                                 | 5 | 0 | V\$HOXA10_01 | HOXA10                         | 0 | 4 | V\$SRF_Q4         | SRF                                                   | 5 | 0 |
| MA0029.1            | Evi1                                | 4 | 0 | V\$HOXD10_01 | HOXD10                         | 0 | 4 | V\$TCF11MAFG_01   | TCF11:MaafG heterodimers                              | 5 | 0 |

|                         |                                    |   |   |                |                                           |   |   |                |                                     |   |   |
|-------------------------|------------------------------------|---|---|----------------|-------------------------------------------|---|---|----------------|-------------------------------------|---|---|
| MA0043.1                | HLF                                | 4 | 0 | V\$HOXD13_01   | HOXD13                                    | 0 | 4 | MA0056.1       | MZF1_1-4                            | 4 | 0 |
| MA0088.1                | znf143                             | 4 | 0 | V\$LIM1_01     | Lim-1                                     | 0 | 4 | V\$AP1_Q2      | activator protein 1                 | 4 | 0 |
| MA0140.1                | Tal1::Gata1                        | 4 | 0 | V\$LMX1_01     | Lmx-1                                     | 0 | 4 | V\$LEF1TCF1_Q4 | LEF1, TCF1                          | 4 | 0 |
| V\$FREAC4_01            | Fork head Related Activator-4      | 4 | 0 | V\$LMX1B_01    | lmx1b                                     | 0 | 4 | V\$MAZR_01     | MAZ related factor                  | 4 | 0 |
| V\$GATA6_01             | GATA-6                             | 4 | 0 | V\$SATB1_01    | Consensus SATB1 Binding Sequence          | 0 | 4 | V\$MIF1_01     | MIBP-1 / RFX1 complex               | 4 | 0 |
| V\$HTF_01               | HTF                                | 4 | 0 | MA0075.1       | Prrx2                                     | 0 | 5 | V\$MYCMAX_03   | c-Myc:Max heterodimer               | 4 | 0 |
| V\$MAF_Q6               | MAF                                | 4 | 0 | I\$ANTP_Q6_01  | Antp                                      | 0 | 5 | V\$MZF1_01     | MZF1                                | 4 | 0 |
| V\$MYCMAX_03            | c-Myc:Max heterodimer              | 4 | 0 | V\$GTF2IRD1_01 | GTF2IRD1-isoform2                         | 0 | 5 | V\$NRSE_B      | neural-restrictive silencer element | 4 | 0 |
| V\$NFMUE1_Q6            | NF-muE1                            | 4 | 0 | V\$LUN1_01     | LUN-1                                     | 0 | 5 | V\$RELP52_01   | kappaB site                         | 4 | 0 |
| V\$NRSF_01              | neuron-restrictive silencer factor | 4 | 0 | V\$BDP1_01     | BDP1                                      | 0 | 6 | MA0017.1       | NR2F1                               | 3 | 0 |
| V\$OLF1_01              | olfactory neuron-specific factor   | 4 | 0 | V\$MEF2C_01    | MEF-2C                                    | 0 | 6 | MA0061.1       | NF-kappaB                           | 3 | 0 |
| V\$PR_02                | progesterone receptor              | 4 | 0 | V\$ERALPHA_01  | 2 ERE half-sites with a 3bp spacer within | 0 | 7 | MA0115.1       | NR1H2::RXRA                         | 3 | 0 |
| V\$SP3_Q3               | Sp3                                | 4 | 0 | V\$RPC155_01   | RPC155                                    | 0 | 7 | MA0164.1       | Nr2e3                               | 3 | 0 |
| V\$CACBINDINGPROTEIN_Q6 | CAC-binding protein                | 4 | 3 | V\$PITX2_Q2    | pituitary homeobox factor 2               | 0 | 9 | V\$AP1FJ_Q2    | activator protein 1                 | 3 | 0 |
| MA0006.1                | Arnt::Ahr                          | 3 | 0 |                |                                           |   |   | V\$ATF4_Q2     | activating transcription factor     | 3 | 0 |



|                   |                                                         |   |   |
|-------------------|---------------------------------------------------------|---|---|
| MA0124.1          | NKX3-1                                                  | 2 | 0 |
| V\$COUP_01        | COUP-TF,<br>HNF-4                                       | 2 | 0 |
| V\$E4F1_Q6        | E4F1                                                    | 2 | 0 |
| V\$EGR3_01        | early growth<br>response gene<br>3 product              | 2 | 0 |
| V\$FOXP1_01       | FOXP1                                                   | 2 | 0 |
| V\$GF11B_01       | Gfi1b                                                   | 2 | 0 |
| V\$HFH4_01        | HFH4 (FOXJ1)                                            | 2 | 0 |
| V\$MEIS1AHOXA9_01 | Meis-<br>1a:HOXA9<br>heterodimeric<br>binding           | 2 | 0 |
| V\$MYOGNF1_01     | myogenin /<br>nuclear factor<br>1 or related<br>factors | 2 | 0 |
| V\$NGFIC_01       | nerve growth<br>factor-induced<br>protein C             | 2 | 0 |
| V\$NRSE_B         | neural-<br>restrictive-<br>silencer-<br>element         | 2 | 0 |
| V\$P63_01         | p63                                                     | 2 | 0 |
| V\$PAX3_B         | Pax-3 binding<br>sites                                  | 2 | 0 |

|             |                                                               |   |   |
|-------------|---------------------------------------------------------------|---|---|
| V\$TITF1_Q3 | TTF-1,<br>TITF1<br>(thyroid<br>transcript<br>ion factor<br>1) | 3 | 0 |
| V\$XBP1_01  | X-box-<br>binding<br>protein 1                                | 3 | 0 |
| V\$HMGA2_01 | HMGA2<br>binding<br>site                                      | 3 | 0 |
| V\$LBP1_Q6  | LBP-1                                                         | 3 | 1 |
| MA0035.2    | Gata1                                                         | 2 | 0 |
| MA0059.1    | MYC::MA<br>X                                                  | 2 | 0 |
| MA0114.1    | HNF4A                                                         | 2 | 0 |
| MA0138.2    | REST                                                          | 2 | 0 |
| V\$AP3_Q6   | AP-3                                                          | 2 | 0 |
| V\$DAX1_01  | Dax1                                                          | 2 | 0 |
| V\$EGR3_01  | early<br>growth<br>response<br>gene 3<br>product              | 2 | 0 |
| V\$FOXP1_01 | FOXP1                                                         | 2 | 0 |
| V\$HFH4_01  | HFH4<br>(FOXJ1)                                               | 2 | 0 |

|                |                                                                               |   |    |
|----------------|-------------------------------------------------------------------------------|---|----|
| V\$PBX_Q3      | Pbx                                                                           | 2 | 0  |
| V\$PPARG_01    | PPAR-gamma<br>(peroxisome<br>proliferator-<br>activated<br>receptor<br>gamma) | 2 | 0  |
| V\$RELP52_01   | kappaB site                                                                   | 2 | 0  |
| V\$TITF1_Q3    | TTF-1, TITF1<br>(thyroid<br>transcription<br>factor 1)                        | 2 | 0  |
| V\$XBP1_01     | X-box-binding<br>protein 1                                                    | 2 | 0  |
| V\$ZNF219_01   | ZNF219                                                                        | 2 | 0  |
| MA0132.1       | Pdx1                                                                          | 2 | 1  |
| V\$HAND1E47_01 | Hand1:E47<br>heterodimer                                                      | 2 | 1  |
| V\$SMAD3_Q6    | SMAD3                                                                         | 2 | 1  |
| V\$TFII_Q6     | TFII-I                                                                        | 2 | 2  |
| V\$RPC155_01   | RPC155                                                                        | 2 | 18 |
| V\$IK_Q5       | Ikaros                                                                        | 2 | 20 |
| MA0007.1       | Ar                                                                            | 1 | 0  |
| MA0048.1       | NHLH1                                                                         | 1 | 0  |
| MA0059.1       | MYC::MAX                                                                      | 1 | 0  |

|                         |                                               |   |   |
|-------------------------|-----------------------------------------------|---|---|
| V\$LTF_Q6               | LTF                                           | 2 | 0 |
| V\$NRSF_01              | neuron-<br>restrictiv<br>e silencer<br>factor | 2 | 0 |
| V\$OLF1_01              | olfactory<br>neuron-<br>specific<br>factor    | 2 | 0 |
| V\$P50RELAP6<br>5_Q5_01 | P50:REL<br>A-P65                              | 2 | 0 |
| V\$PNR_01               | PNR                                           | 2 | 0 |
| V\$FXR_IR1_Q6           | FXR<br>inverted<br>repeat 1                   | 2 | 1 |
| V\$PPARA_01             | PPAR:RX<br>R<br>heterodi<br>mers              | 2 | 1 |
| MA0007.1                | Ar                                            | 1 | 0 |
| MA0048.1                | NHLH1                                         | 1 | 0 |
| MA0057.1                | MZF1_5-<br>13                                 | 1 | 0 |
| MA0069.1                | Pax6                                          | 1 | 0 |
| MA0104.2                | Mycn                                          | 1 | 0 |
| MA0147.1                | Myc                                           | 1 | 0 |
| V\$BRACH_01             | Brachyur<br>y                                 | 1 | 0 |
| V\$CDPCR1_01            | cut-like<br>homeodo<br>main                   | 1 | 0 |



|                 |                              |   |   |
|-----------------|------------------------------|---|---|
|                 |                              |   |   |
| MA0067.1        | Pax2                         | 1 | 0 |
| MA0069.1        | Pax6                         | 1 | 0 |
| MA0072.1        | RORA_2                       | 1 | 0 |
| MA0090.1        | TEAD1                        | 1 | 0 |
| MA0104.2        | Mycn                         | 1 | 0 |
| MA0115.1        | NR1H2::RXRA                  | 1 | 0 |
| MA0154.1        | EBF1                         | 1 | 0 |
| V\$AP3_Q6       | AP-3                         | 1 | 0 |
| V\$AP4_01       | activator protein 4          | 1 | 0 |
| V\$CDPCR3_01    | cut-like homeodomain protein | 1 | 0 |
| V\$CLOCKBMAL_Q6 | CLOCK:BMAL                   | 1 | 0 |
| V\$CMF02        | C-MAF                        | 1 | 0 |
| V\$DAX1_01      | Dax1                         | 1 | 0 |

|                  |                                               |   |   |
|------------------|-----------------------------------------------|---|---|
|                  | protein                                       |   |   |
| V\$CMYC_02       | c-Myc heterodimer (with a 26-29 kDa factor)   | 1 | 0 |
| V\$EBF_Q6        | EBF                                           | 1 | 0 |
| V\$FRA1_Q5       | FRA1                                          | 1 | 0 |
| V\$GZF1_01       | plays a role in renal branching morphogenesis | 1 | 0 |
| V\$HAND1E47_01   | Hand1:E47 heterodimer                         | 1 | 0 |
| V\$HIF2A_01      | HIF-2alpha                                    | 1 | 0 |
| V\$MAF_Q6        | MAF                                           | 1 | 0 |
| V\$MTF1_01       | MTF1                                          | 1 | 0 |
| V\$NFKAPPB5_0_01 | NF-kappaB (p50)                               | 1 | 0 |
| V\$NUR77_Q5      | NUR77                                         | 1 | 0 |
| V\$P50P50_Q3     | P50:P50                                       | 1 | 0 |
| V\$PAX1_B        | Pax-1 binding sites                           | 1 | 0 |
| V\$PPARG_01      | PPAR-gamma (peroxiso                          | 1 | 0 |

|                  |                                                  |   |   |
|------------------|--------------------------------------------------|---|---|
|                  |                                                  |   |   |
| V\$DEAF1_02      | DEAF1                                            | 1 | 0 |
| V\$EGR2_01       | Egr-2/Krox-20 early growth response gene product | 1 | 0 |
| V\$FXR_IR1_Q6    | FXR inverted repeat 1                            | 1 | 0 |
| V\$GZF1_01       | plays a role in renal branching morphogenesis    | 1 | 0 |
| V\$HEN1_02       | HEN1                                             | 1 | 0 |
| V\$IK3_01        | Ikaros 3                                         | 1 | 0 |
| V\$MIZF_01       | MIZF                                             | 1 | 0 |
| V\$NFKAPPAB50_01 | NF-kappaB (p50)                                  | 1 | 0 |
| V\$NMYC_01       | N-Myc                                            | 1 | 0 |
| V\$PAX1_B        | Pax-1 binding sites                              | 1 | 0 |
| V\$PNR_01        | PNR                                              | 1 | 0 |
| V\$PPARA_01      | PPAR:RXR heterodimers                            | 1 | 0 |
| V\$RORA2_01      | RAR-related orphan receptor                      | 1 | 0 |

|               |                                           |   |    |
|---------------|-------------------------------------------|---|----|
|               | me proliferator-activated receptor gamma) |   |    |
| V\$PXR_Q2     | half-site matrix                          | 1 | 0  |
| V\$RXRG_01    | RXRG dimer                                | 1 | 0  |
| V\$TAXCREB_02 | Tax/CREB complex                          | 1 | 0  |
| V\$ZNF219_01  | ZNF219                                    | 1 | 0  |
| MA0150.1      | NFE2L2                                    | 1 | 1  |
| MA0442.1      | SOX10                                     | 1 | 1  |
| F\$AMT1_Q2    | AMT1                                      | 1 | 1  |
| V\$RORA1_01   | RAR-related orphan receptor alpha1        | 1 | 1  |
| V\$TBX18_01   | T-box 18                                  | 1 | 1  |
| MA0090.1      | TEAD1                                     | 1 | 2  |
| V\$AHRHIF_Q6  | AhR, Arnt, HIF-1                          | 1 | 2  |
| V\$P300_01    | p300                                      | 1 | 6  |
| V\$RPC155_01  | RPC155                                    | 1 | 21 |

|                    |                             |   |   |
|--------------------|-----------------------------|---|---|
|                    | alpha2                      |   |   |
| V\$RXRG_01         | RXRG dimer                  | 1 | 0 |
| V\$RXRLXRB_01      | RXR:LXR-beta                | 1 | 0 |
| V\$SOX17_01        | half-site                   | 1 | 0 |
| V\$TAL1BETAITF2_01 | Tal-1beta:ITF-2 heterodimer | 1 | 0 |
| V\$TAXCREB_02      | Tax/CREB complex            | 1 | 0 |
| V\$TBX15_02        | T-box 15                    | 1 | 0 |
| V\$TBX18_01        | T-box 18                    | 1 | 0 |
| V\$ZBED6_01        | ZBED6                       | 1 | 0 |
| MA0065.2           | PPARG::RXRA                 | 1 | 1 |
| MA0150.1           | NFE2L2                      | 1 | 1 |
| V\$TAL1BETAIE47_01 | Tal-1beta:E47 heterodimer   | 1 | 1 |
| V\$ZBRK1_01        | ZBRK1                       | 1 | 1 |
| V\$P300_01         | p300                        | 1 | 3 |
| V\$SOX10_Q6        | SOX10                       | 1 | 5 |

|                          |                                              |   |    |
|--------------------------|----------------------------------------------|---|----|
| V\$IK_Q5                 | Ikaros                                       | 1 | 22 |
| MA0072.1                 | RORA_2                                       | 0 | 1  |
| MA0074.1                 | RXRA::VDR                                    | 0 | 1  |
| MA0091.1                 | TAL1::TCF3                                   | 0 | 1  |
| MA0141.1                 | Esrrb                                        | 0 | 1  |
| MA0149.1                 | EWSR1-FLI1                                   | 0 | 1  |
| V\$AHR_Q5                | aryl hydrocarbon / dioxin receptor           | 0 | 1  |
| V\$AHRARNT_01            | aryl hydrocarbon receptor: Arnt heterodimers | 0 | 1  |
| V\$AP4_01                | activator protein 4                          | 0 | 1  |
| V\$CACCCBINDINGFACTOR_Q6 | CACCC-binding factor                         | 0 | 1  |
| V\$DBP_Q6                | DBP                                          | 0 | 1  |
| V\$GCNF_01               | GCNF (germ cell nuclear factor)              | 0 | 1  |
| V\$LXR_Q3                | LXR                                          | 0 | 1  |
| V\$NEUROD_02             | NeuroD                                       | 0 | 1  |

|                          |                                   |   |    |
|--------------------------|-----------------------------------|---|----|
| V\$LYF1_01               | LyF-1                             | 1 | 21 |
| MA0002.2                 | RUNX1                             | 0 | 1  |
| MA0074.1                 | RXRA::VDR                         | 0 | 1  |
| MA0149.1                 | EWSR1-FLI1                        | 0 | 1  |
| V\$AML2_01               | AML2                              | 0 | 1  |
| V\$ATF4_Q2               | activating transcription factor 4 | 0 | 1  |
| V\$BRACH_01              | Brachyury                         | 0 | 1  |
| V\$CACD_01               | CACD                              | 0 | 1  |
| V\$COREBINDING FACTOR_Q6 | core-binding factor               | 0 | 1  |
| V\$DBP_Q6                | DBP                               | 0 | 1  |
| V\$ERR2_01               | ERR2 (ESRRB)                      | 0 | 1  |
| V\$HEB_Q6                | HEB                               | 0 | 1  |
| V\$LMAF_Q2               | LMAF                              | 0 | 1  |

|                          |                                                                           |   |   |
|--------------------------|---------------------------------------------------------------------------|---|---|
| V\$PAX_Q6                | Pax                                                                       | 0 | 1 |
| V\$RFX_Q6                | RFX                                                                       | 0 | 1 |
| V\$RORA2_01              | RAR-related orphan receptor alpha2                                        | 0 | 1 |
| V\$TAL1BETA E47_01       | Tal-1beta:E47 heterodimer                                                 | 0 | 1 |
| V\$VDRRXR_01             | VDR:RXR                                                                   | 0 | 1 |
| V\$ZBED6_01              | ZBED6                                                                     | 0 | 1 |
| V\$ZEC_01                | zinc finger protein expressed in embryonal cells and certain adult organs | 0 | 1 |
| MA0133.1                 | BRCA1                                                                     | 0 | 2 |
| MA0155.1                 | INSM1                                                                     | 0 | 2 |
| V\$AML_Q6                | AML                                                                       | 0 | 2 |
| V\$BACH1_01              | BTB and CNC homolog 1                                                     | 0 | 2 |
| V\$CACD_01               | CACD                                                                      | 0 | 2 |
| V\$COREBINDING FACTOR_Q6 | core-binding factor                                                       | 0 | 2 |

|               |                                                                           |   |   |
|---------------|---------------------------------------------------------------------------|---|---|
| V\$LMO2COM_02 | complex of Lmo2 bound to Tal-1, E2A proteins, and GATA-1, half-site 2     | 0 | 1 |
| V\$MOV0B_01   | MOV0-B                                                                    | 0 | 1 |
| V\$MTERF_01   | mTERF binding site                                                        | 0 | 1 |
| V\$MTF1_Q4    | MTF-1                                                                     | 0 | 1 |
| V\$MYOD_01    | myoblast determination gene product                                       | 0 | 1 |
| V\$RORA1_01   | RAR-related orphan receptor alpha1                                        | 0 | 1 |
| V\$TEF1_Q6    | TEF-1                                                                     | 0 | 1 |
| V\$VDRRXR_01  | VDR:RXR                                                                   | 0 | 1 |
| V\$ZEC_01     | zinc finger protein expressed in embryonal cells and certain adult organs | 0 | 1 |
| V\$ZID_01     | zinc finger with interaction domain                                       | 0 | 1 |
| V\$AHR_01     | aryl hydrocarbon / dioxin receptor                                        | 0 | 2 |

|              |                                              |   |   |
|--------------|----------------------------------------------|---|---|
| V\$MOV0B_01  | MOV0-B                                       | 0 | 2 |
| MA0002.2     | RUNX1                                        | 0 | 3 |
| MA0154.1     | EBF1                                         | 0 | 3 |
| V\$ERR1_Q2   | estrogen-related receptor alpha              | 0 | 3 |
| V\$RP58_01   | 58 KDA repressor protein                     | 0 | 3 |
| V\$SZF11_01  | SZF1-1                                       | 0 | 3 |
| V\$ZID_01    | zinc finger with interaction domain          | 0 | 3 |
| V\$SMAD4_Q6  | SMAD4                                        | 0 | 4 |
| V\$SREBP1_01 | sterol regulator y element-binding protein 1 | 0 | 4 |
| V\$RREB1_01  | Ras-responsive element binding protein 1     | 0 | 5 |
| V\$SMAD3_Q6  | SMAD3                                        | 0 | 5 |

|               |                                                                                                      |   |   |
|---------------|------------------------------------------------------------------------------------------------------|---|---|
| V\$CP2_01     | CP2                                                                                                  | 0 | 2 |
| V\$E12_Q6     | E12                                                                                                  | 0 | 2 |
| V\$ER_Q6_02   | half-site<br>matrix, half-<br>ERE                                                                    | 0 | 2 |
| V\$ERR1_Q2    | estrogen-<br>related<br>receptor alpha                                                               | 0 | 2 |
| V\$GCNF_01    | GCNF (germ<br>cell nuclear<br>factor)                                                                | 0 | 2 |
| V\$RREB1_01   | Ras-<br>responsive<br>element<br>binding<br>protein 1                                                | 0 | 2 |
| V\$SZF11_01   | SZF1-1                                                                                               | 0 | 2 |
| V\$T3R_Q6     | half-site<br>matrix                                                                                  | 0 | 2 |
| V\$VDR_Q3     | vitamin D<br>receptor;<br>mediates<br>vitamin D3-<br>signaling, often<br>dimerizes with<br>RXR-alpha | 0 | 2 |
| MA0071.1      | RORA_1                                                                                               | 0 | 3 |
| MA0119.1      | TLX1::NFIC                                                                                           | 0 | 3 |
| MA0133.1      | BRCA1                                                                                                | 0 | 3 |
| MA0141.1      | Esrrb                                                                                                | 0 | 3 |
| V\$AHRARNT_01 | aryl<br>hydrocarbon<br>receptor:Arnt                                                                 | 0 | 3 |

|              |                                                  |   |   |
|--------------|--------------------------------------------------|---|---|
| V\$TBX5_01   | TBX5                                             | 0 | 5 |
| V\$TEF1_Q6   | TEF-1                                            | 0 | 5 |
| V\$SF1_Q6_01 | SF1                                              | 0 | 6 |
| MA0163.1     | PLAG1                                            | 0 | 7 |
| V\$COUPTF_Q6 | COUPTF                                           | 0 | 7 |
| V\$E47_01    | E47                                              | 0 | 7 |
| V\$GCM_Q2    | GCM                                              | 0 | 7 |
| V\$Ikaros_01 | Ikaros 2                                         | 0 | 7 |
| V\$MYOD_01   | myoblast<br>determin<br>ation<br>gene<br>product | 0 | 7 |
| V\$CHOP_01   | heterodi<br>mers of<br>CHOP<br>and<br>C/EBPalpha | 0 | 8 |
| V\$TFIIH_Q6  | TFII-I                                           | 0 | 8 |
| V\$YY2       | YY2                                              | 0 | 8 |
| MA0119.1     | TLX1::NF<br>IC                                   | 0 | 9 |
| MA0258.1     | ESR2                                             | 0 | 9 |

|              |                                                                              |   |   |
|--------------|------------------------------------------------------------------------------|---|---|
|              | heterodimers                                                                 |   |   |
| V\$CTF1_01   | selection of the binding sites for CTCF by HOX11 cooperative DNA binding [2] | 0 | 3 |
| V\$HIC1_02   | HIC1                                                                         | 0 | 3 |
| V\$LXR_Q3    | LXR                                                                          | 0 | 3 |
| V\$MATH1_Q2  | E47:MATH1                                                                    | 0 | 3 |
| V\$SF1_Q6_01 | SF1                                                                          | 0 | 3 |
| V\$TBX5_01   | TBX5                                                                         | 0 | 3 |
| V\$GCM_Q2    | GCM                                                                          | 0 | 4 |
| V\$SPZ1_01   | spermatogenic Zip                                                            | 0 | 4 |
| MA0089.1     | NFE2L1::MafG                                                                 | 0 | 5 |
| MA0092.1     | Hand1::Tcf2a                                                                 | 0 | 5 |
| V\$AHRHIF_Q6 | AhR, Arnt, HIF-                                                              | 0 | 5 |

|                          |                                                                                   |   |    |
|--------------------------|-----------------------------------------------------------------------------------|---|----|
| V\$CACBINDIN GPROTEIN_Q6 | CAC-binding protein                                                               | 0 | 9  |
| V\$CTF1_01               | selection of the binding sites for CTCF by HOX11 cooperative DNA binding [2]      | 0 | 9  |
| V\$HIC1_02               | HIC1                                                                              | 0 | 9  |
| V\$LRF_Q2                | LRF                                                                               | 0 | 9  |
| V\$MEF2C_01              | MEF-2C                                                                            | 0 | 9  |
| V\$VDR_Q3                | vitamin D receptor; mediates vitamin D3-signaling, often dimerizes with RXR-alpha | 0 | 9  |
| V\$CMF_Q2                | C-MAF                                                                             | 0 | 10 |
| V\$CP2_01                | CP2                                                                               | 0 | 10 |
| V\$ER_Q6_02              | half-site matrix, half-ERE                                                        | 0 | 10 |
| V\$SPZ1_01               | spermatogenic Zip                                                                 | 0 | 10 |
| V\$TBR2_01               | TBR2                                                                              | 0 | 10 |

|                |                                             |   |    |
|----------------|---------------------------------------------|---|----|
|                | 1                                           |   |    |
| V\$CHOP_01     | heterodimers of CHOP and C/EBPalpha         | 0 | 5  |
| V\$EBOX_Q6_01  | Ebox                                        | 0 | 5  |
| V\$LRF_Q2      | LRF                                         | 0 | 5  |
| V\$MYOGENIN_Q6 | myogenin                                    | 0 | 5  |
| MA0032.1       | FOXC1                                       | 0 | 6  |
| MA0163.1       | PLAG1                                       | 0 | 6  |
| MA0258.1       | ESR2                                        | 0 | 6  |
| V\$RORBETA_Q2  | RORBETA                                     | 0 | 6  |
| V\$GLI3_01     | GLI3                                        | 0 | 7  |
| V\$IK2_01      | Ikaros 2                                    | 0 | 7  |
| V\$LRH1_Q5     | LRH1                                        | 0 | 7  |
| V\$TBR2_01     | TBR2                                        | 0 | 7  |
| V\$COUPTF_Q6   | COUPTF                                      | 0 | 8  |
| V\$SREBP1_01   | sterol regulatory element-binding protein 1 | 0 | 8  |
| MA0112.2       | ESR1                                        | 0 | 9  |
| V\$PUR1_Q4     | PUR1                                        | 0 | 9  |
| MA0161.1       | NFIC                                        | 0 | 10 |
| V\$YY2         | YY2                                         | 0 | 10 |
| MA0111.1       | Spz1                                        | 0 | 11 |

|               |                    |   |    |
|---------------|--------------------|---|----|
|               |                    |   |    |
| MA0089.1      | NFE2L1:: MafG      | 0 | 11 |
| V\$E12_Q6     | E12                | 0 | 11 |
| V\$LRH1_Q5    | LRH1               | 0 | 11 |
| V\$RORBETA_Q2 | RORBETA            | 0 | 11 |
| V\$TFE_Q6     | TFE                | 0 | 12 |
| MA0146.1      | Zfx                | 0 | 13 |
| V\$GLI3_01    | GLI3               | 0 | 13 |
| V\$HEB_Q6     | HEB                | 0 | 13 |
| V\$MATH1_Q2   | E47:MAT H1         | 0 | 13 |
| V\$T3R_Q6     | half-site matrix   | 0 | 13 |
| MA0112.2      | ESR1               | 0 | 14 |
| V\$HES1_Q2    | HES1               | 0 | 14 |
| V\$NURR1_Q3   | NURR1              | 0 | 14 |
| MA0092.1      | Hand1::T cfe2a     | 0 | 15 |
| MA0111.1      | Spz1               | 0 | 15 |
| V\$DEC_Q1     | DEC                | 0 | 15 |
| V\$EBOX_Q6_01 | Ebox               | 0 | 15 |
| V\$LMAF_Q2    | LMAF               | 0 | 15 |
| V\$ZNF515_01  | Glis binding sites | 0 | 15 |



|                |                    |   |    |
|----------------|--------------------|---|----|
| V\$E2A_Q6      | E2A                | 0 | 11 |
| V\$SMAD_Q6     | SMAD               | 0 | 11 |
| V\$MEF2C_01    | MEF-2C             | 0 | 12 |
| V\$TFE_Q6      | TFE                | 0 | 13 |
| V\$ZNF515_01   | Glis binding sites | 0 | 13 |
| V\$HES1_Q2     | HES1               | 0 | 14 |
| V\$SREBP_Q3    | SREBP              | 0 | 14 |
| V\$DEC_Q1      | DEC                | 0 | 15 |
| V\$MAFA_Q4_01  | MAFA               | 0 | 15 |
| V\$NURR1_Q3    | NURR1              | 0 | 15 |
| V\$USF2_Q6     | USF2               | 0 | 15 |
| MA0160.1       | NR4A2              | 0 | 16 |
| V\$E47_02      | E47                | 0 | 16 |
| V\$GLI1_01     | GLI1               | 0 | 16 |
| V\$OSF2_Q6     | Osf2               | 0 | 16 |
| V\$TTF1_Q6     | TTF-1 (Nkx2-1)     | 0 | 17 |
| MA0103.1       | ZEB1               | 0 | 18 |
| V\$DELTAEF1_01 | deltaEF1           | 0 | 18 |
| V\$GLI2_01     | GLI2               | 0 | 18 |

|                |                                                                       |   |    |
|----------------|-----------------------------------------------------------------------|---|----|
| MA0122.1       | Nkx3-2                                                                | 0 | 16 |
| V\$GLI1_01     | GLI1                                                                  | 0 | 16 |
| V\$OSF2_Q6     | Osf2                                                                  | 0 | 16 |
| V\$SMAD_Q6     | SMAD                                                                  | 0 | 16 |
| V\$LMO2COM_01  | complex of Lmo2 bound to Tal-1, E2A proteins, and GATA-1, half-site 1 | 0 | 17 |
| V\$USF2_Q6     | USF2                                                                  | 0 | 17 |
| V\$GLI2_01     | GLI2                                                                  | 0 | 18 |
| MA0160.1       | NR4A2                                                                 | 0 | 19 |
| V\$DELTAEF1_01 | deltaEF1                                                              | 0 | 19 |
| V\$TTF1_Q6     | TTF-1 (Nkx2-1)                                                        | 0 | 19 |
| V\$GLI_Q2      | GLI                                                                   | 0 | 20 |
| V\$LUN1_01     | LUN-1                                                                 | 0 | 20 |
| V\$SREBP_Q3    | SREBP                                                                 | 0 | 20 |
| MA0019.1       | Ddit3::Ce bpa                                                         | 0 | 21 |
| MA0103.1       | ZEB1                                                                  | 0 | 21 |
| MA0161.1       | NFIC                                                                  | 0 | 21 |
| V\$LYF1_01     | LyF-1                                                                 | 0 | 21 |
| V\$MYOGENIN_Q6 | myogenin                                                              | 0 | 21 |
| V\$AML1_01     | runt-factor                                                           | 0 | 22 |

|               |                                           |   |    |
|---------------|-------------------------------------------|---|----|
| V\$LFA1_Q6    | LF-A1                                     | 0 | 18 |
| MA0122.1      | Nkx3-2                                    | 0 | 19 |
| MA0146.1      | Zfx                                       | 0 | 19 |
| V\$GLI_Q2     | GLI                                       | 0 | 19 |
| V\$AML1_Q4    | AML1                                      | 0 | 20 |
| V\$MAFB_01    | MAFB                                      | 0 | 20 |
| V\$AP2REP_01  | AP-2 repressor                            | 0 | 21 |
| V\$ZIC1_01    | zinc finger protein of the cerebellum 1   | 0 | 21 |
| V\$ZIC2_01    | zinc finger protein of the cerebellum 2   | 0 | 21 |
| V\$ZIC3_01    | zinc finger protein of the cerebellum 3   | 0 | 21 |
| MA0019.1      | Ddit3::Cebpa                              | 0 | 22 |
| V\$ERALPHA_01 | 2 ERE half-sites with a 3bp spacer within | 0 | 22 |
| V\$ING4_01    | ING4                                      | 0 | 22 |
| V\$KID3_01    | Kid3                                      | 0 | 22 |
| V\$LUN1_01    | LUN-1                                     | 0 | 22 |

|                |                                           |   |    |
|----------------|-------------------------------------------|---|----|
| V\$E2A_Q2      | AML-1<br>E2A                              | 0 | 22 |
| V\$ERALPHA_01  | 2 ERE half-sites with a 3bp spacer within | 0 | 22 |
| V\$TERALPHA_Q6 | TERALPHA                                  | 0 | 22 |
| MA0130.1       | ZNF354C                                   | 0 | 23 |
| V\$AP2REP_01   | AP-2 repressor                            | 0 | 23 |
| V\$ARP1_01     | apolipoprotein AI regulatory protein 1    | 0 | 23 |
| V\$BDP1_01     | BDP1                                      | 0 | 23 |
| V\$GTF2IRD1_01 | GTF2IRD1-isoform2                         | 0 | 23 |
| V\$ING4_01     | ING4                                      | 0 | 23 |
| V\$KID3_01     | Kid3                                      | 0 | 23 |
| V\$LFA1_Q6     | LF-A1                                     | 0 | 23 |
| V\$MAFA_Q4_01  | MAFA                                      | 0 | 23 |
| V\$MAFB_01     | MAFB                                      | 0 | 23 |
| V\$PUR1_Q4     | PUR1                                      | 0 | 23 |
| V\$SREBP2_Q6   | SREBP2                                    | 0 | 23 |

|                |                                              |   |    |
|----------------|----------------------------------------------|---|----|
| V\$SREBP2_Q6   | SREBP2                                       | 0 | 22 |
| MA0130.1       | ZNF354C                                      | 0 | 23 |
| V\$ARP1_01     | apolipoprotein<br>AI regulatory<br>protein 1 | 0 | 23 |
| V\$BDP1_01     | BDP1                                         | 0 | 23 |
| V\$GTF2IRD1_01 | GTF2IRD1-<br>isoform2                        | 0 | 23 |
| V\$TERALPHA_Q6 | TERALPHA                                     | 0 | 23 |

|            |                                                         |   |    |
|------------|---------------------------------------------------------|---|----|
| V\$ZIC1_01 | zinc<br>finger<br>protein of<br>the<br>cerebellu<br>m 1 | 0 | 23 |
| V\$ZIC2_01 | zinc<br>finger<br>protein of<br>the<br>cerebellu<br>m 2 | 0 | 23 |
| V\$ZIC3_01 | zinc<br>finger<br>protein of<br>the<br>cerebellu<br>m 3 | 0 | 23 |
